# Supplementary material
Source: publisher figshare collection journal article supplement (https://gsapubs.figshare.com/ndownloader/files/33622280)
Supplement: Supplementary file 1 [file 33622280]

## Sheet: Table S1
Table S1, Major and trace element composition of the studied black shale of Lantian biota
Depth (m)	Al (Value)	Al (Error)	Si (Value)	Si (Error)	Ca (Value)	Ca (Error)	S (Value)	S (Error)	K (Value)	K (Error)	Mn (Value)	Mn (Error)	Fe (Value)	Fe (Error)	Mo (Value)	Mo (Error)	V (Value)	V (Error)	Cr (Value)	Cr (Error)	U (Value)	U (Error)	P (Value)	P (Error)	Cu (Value)	Cu (Error)	Zn (Value)	Zn (Error)	As (Value)	As (Error)	Sr (Value)	Sr (Error)	Zr (Value)	Zr (Error)	Ni (Value)	Ni (Error)	Hf (Value)	Hf (Error)	Pb (Value)	Pb (Error)	Ti (Value)	Ti (Error)	Ba (Value)	Ba (Error)	Mg (Value)	Mg (Error)
0.01	4232	1000	9530	371	4082	386	0	0	0	0	6	10	92	12	0	1	16	20	1	14	2	1	0	0	5	3	179	7	1	0	2	1	0	0	72	26	0	0	2	1	45	43	4609	510	24357	11430
0.011	4836	1103	10228	391	4443	406	0	0	0	0	11	10	93	13	0	0	19	20	25	17	2	1	0	0	4	3	174	7	0	0	3	1	0	1	76	27	0	2	3	2	62	46	5053	555	31845	14883
0.012	4151	1006	9460	371	4337	395	0	0	0	0	14	11	95	13	1	1	23	21	11	15	2	1	0	0	7	3	180	7	1	0	3	1	1	1	70	25	0	0	2	1	56	45	4584	508	27282	12779
0.013	4431	1022	9493	370	4095	387	0	0	0	0	8	10	93	13	0	1	17	20	14	15	2	1	0	0	5	3	159	7	1	0	3	1	0	0	77	27	0	0	1	1	39	45	4546	504	24757	11615
0.014	4124	1011	9465	370	4265	396	0	0	0	0	12	10	88	12	0	1	15	20	14	15	2	1	0	0	8	3	179	7	1	0	3	1	0	0	78	28	0	0	1	1	32	44	4762	526	27306	12789
0.015	2557	1477	10681	597	3871	370	0	0	0	0	10	10	94	12	0	1	2	19	13	15	3	1	0	0	6	3	160	7	0	0	3	1	0	0	70	25	0	0	2	1	0	0	4285	569	17511	8607
0.016	6206	1138	10391	397	4696	415	0	0	0	0	12	11	99	13	1	1	14	20	11	15	1	1	0	0	7	3	177	7	0	0	3	1	0	1	75	27	0	0	3	2	65	46	4988	549	28398	13293
0.017	5934	1144	10249	393	4567	412	0	0	0	0	8	10	87	12	0	1	10	20	15	16	3	2	0	0	7	3	187	8	0	0	3	1	0	0	79	28	0	0	2	1	59	46	5119	562	28094	13143
0.018	4227	1013	9442	371	4298	392	0	0	0	0	7	9	86	12	1	1	6	18	5	14	2	1	0	0	6	3	151	7	0	0	2	1	1	1	71	25	0	0	2	1	7	44	4674	517	30074	14058
0.019	4861	1040	9571	373	3696	367	0	0	0	0	6	9	88	12	1	1	11	17	13	14	2	1	0	0	4	3	98	5	0	0	2	1	1	1	63	22	0	0	3	1	32	40	4500	499	23842	11188
0.02	2009	788	8497	341	2617	310	0	0	0	0	8	9	85	11	0	1	7	17	22	15	1	1	0	0	5	2	58	4	0	0	1	1	0	1	66	23	0	0	3	1	26	37	4073	456	17106	8076
0.021	687	660	7992	324	793	208	0	0	0	0	12	8	69	9	0	1	5	14	13	12	0	1	0	0	3	2	4	2	0	0	1	0	1	1	50	18	0	0	2	1	3	33	777	205	10701	5115
0.022	547	655	7843	320	762	205	0	0	0	0	10	7	74	10	0	1	11	15	23	13	0	1	0	0	2	2	3	2	0	0	1	0	0	1	53	19	0	0	2	1	0	0	772	204	11722	5573
0.023	586	654	7767	319	803	208	0	0	0	0	2	7	72	10	0	0	14	15	13	12	0	1	0	0	4	2	4	2	0	0	1	0	0	1	51	18	0	0	2	1	6	32	811	206	11194	5335
0.024	649	650	7699	317	863	214	0	0	0	0	5	8	71	10	1	1	9	15	17	13	0	1	0	0	0	2	3	2	0	0	0	0	0	1	53	19	0	2	2	1	18	33	819	206	10335	4947
0.025	533	616	6915	297	753	203	0	0	0	0	12	8	66	9	0	1	5	14	18	12	1	1	0	0	3	2	3	2	0	0	1	0	0	1	49	17	0	0	2	1	0	33	623	190	9552	4583
0.026	547	649	7716	317	635	199	0	0	0	0	5	7	80	10	0	1	0	0	7	11	0	1	0	0	2	2	3	2	0	0	1	0	0	1	51	18	0	0	1	1	15	32	799	205	11478	5462
0.027	16	880	6563	412	833	207	0	0	0	0	7	7	69	9	0	1	8	15	13	12	1	1	0	0	2	2	2	2	0	0	1	0	0	1	50	18	0	0	1	1	2	32	673	276	6559	3463
0.028	474	638	7404	310	961	216	0	0	0	0	11	8	69	10	0	1	1	14	9	11	0	1	0	0	1	2	2	2	0	0	0	0	0	1	50	18	0	0	2	1	0	0	785	206	11552	5497
0.029	354	638	7555	313	770	205	0	0	0	0	4	7	65	9	1	1	2	13	13	12	0	1	0	0	2	2	3	2	0	0	1	0	0	1	52	18	0	0	1	1	29	32	726	201	10219	4892
0.03	697	659	7743	319	868	213	0	0	0	0	2	7	72	10	0	1	6	14	19	13	0	1	0	0	2	2	2	2	0	0	1	0	1	1	52	18	0	0	1	1	0	0	859	210	12512	5933
0.031	684	658	8006	324	872	213	0	0	0	0	9	8	69	10	0	1	9	15	6	11	0	1	0	0	2	2	3	2	0	0	1	0	0	1	53	19	0	0	2	1	12	33	878	210	9903	4754
0.032	568	654	7890	322	883	216	0	0	0	0	8	8	81	10	0	1	3	14	14	12	0	1	0	0	3	2	2	2	0	0	0	0	0	1	56	20	0	0	2	1	1	34	875	210	10277	4919
0.033	562	636	7528	312	880	233	0	0	0	0	4	8	74	11	0	1	10	17	17	14	0	1	0	0	4	2	2	2	0	0	0	0	1	1	54	19	0	0	1	1	7	35	673	194	9907	4741
0.034	448	632	7499	312	966	216	0	0	0	0	8	8	81	10	0	1	5	14	10	11	1	1	0	0	3	2	1	2	0	0	1	0	0	1	52	19	0	0	2	1	1	33	733	198	9319	4476
0.035	698	693	8762	344	1075	229	0	0	0	0	4	8	92	11	0	1	0	0	19	13	1	1	0	0	4	2	3	2	0	0	1	0	0	1	56	20	0	0	2	1	24	34	943	219	11921	5675
0.036	989	708	9032	350	1000	222	0	0	0	0	6	8	98	11	0	1	8	15	11	12	0	1	0	0	2	2	3	2	0	0	1	0	0	1	53	19	0	0	2	1	3	33	959	220	12643	6007
0.037	172	1128	4457	509	431	181	0	0	0	0	6	7	72	9	0	0	0	0	17	12	0	1	0	0	2	2	3	1	0	0	1	0	0	1	44	16	0	0	1	1	0	0	75	313	3214	2530
0.038	344	629	7548	311	135	291	0	0	0	0	27	15	61	18	0	1	13	22	37	24	1	2	0	0	1	3	3	3	0	0	1	1	0	1	29	13	2	3	2	2	0	0	693	189	9734	4658
0.039	1172	706	9031	349	1368	240	0	0	0	0	115	18	281	18	0	0	3	15	21	14	1	1	0	0	3	2	3	2	0	0	3	1	1	1	52	18	0	0	2	1	52	37	764	202	11230	5363
0.04	6296	1254	25148	704	6807	530	12493	173	0	0	534	55	3370	89	0	0	82	31	12	20	11	2	0	0	8	3	5	3	2	0	12	1	12	1	90	33	0	0	7	2	382	106	996	259	11475	5577
0.041	14245	1890	38449	986	9730	679	17310	207	0	0	495	56	5881	139	0	0	133	40	1	24	17	3	0	0	13	4	13	4	3	1	13	1	21	2	116	42	0	0	11	2	781	186	1210	303	13383	6547
0.042	9949	1678	43503	1078	8729	632	11910	179	0	0	1044	93	4568	114	0	0	131	39	6	25	17	3	0	0	9	4	13	3	2	1	13	1	20	2	112	40	0	0	10	2	745	178	898	282	12923	6277
0.043	10472	1752	48445	1176	7762	592	10126	175	0	0	730	71	4808	119	0	0	129	37	5	23	18	3	0	0	11	4	9	3	2	1	12	1	20	2	108	39	0	0	10	2	852	198	997	288	10437	5196
0.044	9943	1669	43283	1070	8456	612	7229	155	0	0	635	63	4129	105	0	0	131	37	1	23	18	2	0	0	10	4	7	3	2	0	13	1	19	2	98	35	0	0	9	2	782	183	857	269	11258	5532
0.045	6409	2153	31029	1118	6879	640	4095	224	0	0	485	59	3128	98	0	0	77	37	13	25	13	3	0	0	5	4	5	3	1	1	10	1	16	2	78	29	0	0	9	2	684	176	319	372	4424	3319
0.046	9954	1704	46543	1135	8086	789	8555	162	0	0	456	64	3774	124	0	0	90	47	0	0	16	3	0	0	6	5	8	4	3	1	14	2	15	2	101	38	0	0	6	3	714	197	893	279	10738	5311
0.047	12134	1847	47950	1166	11588	740	5911	159	0	0	1121	99	4886	121	0	0	150	40	1	25	18	3	0	0	7	4	12	3	2	1	18	1	19	2	112	40	0	0	9	2	741	177	1101	299	12979	6327
0.048	11602	1819	48107	1169	11256	724	3375	164	0	0	4720	353	5017	122	0	0	166	42	0	0	17	3	0	0	10	4	14	4	1	1	18	1	20	2	129	46	0	0	11	3	945	216	1165	304	12723	6207
0.049	2583	2553	18936	1208	8121	548	5089	335	0	0	3285	248	11615	230	0	0	71	29	0	0	15	2	0	0	9	4	76	6	0	0	15	1	12	1	107	40	0	0	17	3	601	142	7	536	416	3243
0.05	11823	1813	44822	1110	10418	690	5395	164	0	0	6408	473	7643	168	0	0	168	43	0	0	19	3	0	0	7	4	44	5	1	1	17	2	19	2	126	46	0	0	11	3	861	200	1267	312	15282	7357
0.051	15187	1951	39201	994	9289	634	0	0	182	839	5136	381	4196	104	0	0	172	41	0	0	16	3	0	0	7	4	11	3	1	1	15	1	18	2	123	44	0	0	10	2	856	195	1105	279	11660	5781
0.052	12562	1892	50666	1220	10160	682	0	0	704	894	4214	316	3327	90	0	0	129	41	0	34	18	3	0	0	9	4	9	3	1	1	15	1	22	2	118	42	0	0	8	2	750	177	1183	300	11601	5727
0.053	12359	1902	52767	1260	12088	757	0	0	177	882	3958	298	2761	80	0	0	175	43	3	33	20	3	0	0	9	4	8	3	1	1	17	1	19	2	122	44	0	0	8	2	796	187	1267	309	11489	5680
0.054	11982	1829	47802	1161	12071	750	0	0	355	884	3564	270	2559	75	0	0	192	44	0	0	20	3	0	0	8	4	5	3	1	1	16	1	21	2	122	43	0	0	8	2	806	190	842	278	10645	5289
0.055	12290	1901	52292	1253	11386	731	0	0	182	882	3058	235	3004	84	0	0	135	40	0	0	18	3	0	0	8	4	6	3	1	0	19	1	20	2	123	44	0	0	8	2	783	186	1128	301	15529	7462
0.056	11976	1850	49210	1190	11304	722	0	0	0	0	1887	152	3957	102	0	0	122	37	11	26	18	3	0	0	7	4	11	3	2	1	22	1	19	2	122	44	0	0	10	2	833	194	1073	294	13876	6721
0.057	10731	1711	43024	1063	12942	779	2578	148	0	0	1418	119	4961	121	0	0	112	36	0	0	17	3	0	0	9	4	13	3	2	1	27	2	16	2	126	45	0	0	11	2	857	198	1035	283	11219	5524
0.058	12722	1929	52522	1258	12960	798	2678	159	582	905	1714	141	4764	119	0	0	105	40	10	28	20	3	0	0	9	4	8	3	2	1	28	2	19	2	112	40	0	0	10	2	774	185	1340	321	14190	6879
0.059	12116	1804	44454	1094	13917	818	0	0	189	892	3005	231	4248	108	0	0	167	42	0	0	19	3	0	0	8	4	6	3	2	1	23	2	19	2	119	43	0	0	8	2	896	206	777	276	12279	6005
0.06	12370	1890	50975	1227	13321	803	0	0	394	881	3777	286	3718	98	0	0	167	43	0	0	19	3	0	0	10	4	17	4	2	1	21	1	20	2	117	42	0	0	8	2	965	219	1237	312	12944	6324
0.061	14045	2009	53566	1278	11751	748	0	0	543	888	2204	174	2880	83	0	0	121	39	11	29	18	3	0	0	7	4	5	3	2	0	20	1	29	2	108	39	0	0	5	2	883	205	1195	305	12594	6181
0.062	13858	1998	54277	1291	11627	742	0	0	105	896	1243	106	3074	87	0	0	134	39	0	0	18	3	0	0	7	4	6	3	1	1	24	2	20	2	104	37	0	0	8	2	897	207	1093	298	10422	5208
0.063	12397	1848	47657	1156	12210	755	0	0	128	868	825	76	3002	85	0	0	143	39	7	24	17	3	0	0	5	3	9	3	1	0	21	1	20	2	99	36	0	0	6	2	763	181	818	273	8957	4558
0.064	12531	1897	50882	1223	11782	747	3274	159	0	0	985	89	4590	115	0	0	151	40	12	25	19	3	0	0	11	4	11	4	2	1	29	2	19	2	119	43	0	0	10	2	879	204	1232	308	11410	5649
0.065	13235	1972	54969	1305	10901	716	0	0	71	905	1184	102	3314	91	0	0	164	42	2	26	21	3	0	0	11	4	8	3	2	0	21	1	21	2	114	41	0	0	5	2	818	193	883	289	12650	6191
0.066	12541	1993	53253	1296	12567	776	0	0	198	895	1216	105	3681	98	0	0	138	41	5	27	19	3	0	0	9	4	9	3	2	0	21	1	21	2	114	41	0	0	7	2	794	187	1173	316	10631	5345
0.067	13296	1997	56797	1344	11275	737	3022	158	0	0	1443	122	5016	124	0	0	206	47	0	0	20	3	0	0	11	4	24	4	2	1	22	2	21	2	133	47	0	0	12	2	909	210	1619	336	12786	6258
0.068	15000	2079	55415	1316	10078	687	0	0	560	897	1787	145	3023	85	0	0	205	46	0	0	20	3	0	0	8	4	12	3	1	0	18	1	21	2	112	40	0	0	8	2	980	223	1032	291	12202	6012
0.069	14051	2014	55326	1310	10947	716	0	0	483	893	1312	111	2787	81	0	0	160	41	0	0	19	3	0	0	7	4	5	3	1	0	20	1	21	2	102	37	0	0	7	2	882	204	865	282	9270	4716
0.07	15638	2589	46254	1331	11570	730	0	0	134	890	1566	129	3568	95	0	0	144	40	2	27	19	3	0	0	11	4	10	3	1	0	25	2	18	2	104	37	0	0	7	2	865	200	1313	404	6678	4273
0.071	14724	2065	56227	1330	10521	703	0	0	340	906	1172	101	2703	80	0	0	202	45	10	26	19	3	0	0	7	4	7	3	1	0	23	1	21	2	107	38	0	0	6	2	883	205	1221	300	10552	5282
0.072	14364	2158	54668	1341	10831	713	0	0	98	902	977	87	2932	84	0	0	181	44	10	26	20	3	0	0	6	4	5	3	1	0	28	2	20	2	107	38	0	0	7	2	837	196	1156	319	10721	5435
0.073	17633	2345	66756	1547	12109	779	0	0	127	952	1852	151	3802	102	0	0	137	43	2	29	23	3	0	0	8	4	8	3	1	1	28	2	21	2	124	44	0	0	9	2	888	208	1399	336	12249	6079
0.074	16446	2272	66970	1549	11217	885	0	0	0	0	1573	141	3390	110	0	0	181	55	0	0	19	4	0	0	11	5	8	4	1	1	30	2	20	2	112	41	0	0	6	3	854	219	1499	339	13315	6525
0.075	14616	2102	60090	1409	12136	770	0	0	266	920	1384	117	3927	104	0	0	156	43	0	0	19	3	0	0	7	4	8	3	1	1	32	2	17	2	116	41	0	0	7	2	775	184	1306	318	12376	6102
0.076	14920	2123	60984	1427	10549	708	0	0	745	898	1585	132	5104	125	0	0	121	41	2	27	18	3	0	0	6	4	8	3	2	1	31	2	16	2	115	42	0	0	10	2	766	182	1292	316	9054	4656
0.077	15446	2134	57872	1367	14865	873	0	0	185	936	4022	304	4587	116	0	0	128	42	0	0	18	3	0	0	8	4	14	4	1	1	27	2	19	2	127	46	0	0	9	3	956	221	1250	321	11566	5759
0.078	16561	2239	60742	1429	13097	817	3502	161	0	0	3056	237	5727	138	0	0	160	46	0	0	20	3	0	0	11	5	18	4	2	1	25	2	21	2	131	47	0	0	7	2	1069	243	1583	346	16095	7765
0.079	16666	2248	62202	1455	7857	859	0	0	79	1319	1933	178	4200	144	0	0	128	61	0	0	16	4	0	0	2	5	4	4	1	1	16	2	17	2	79	32	0	0	7	3	810	226	1328	314	14502	7054
0.08	14802	2639	50041	1436	11604	735	0	0	147	897	2812	217	4773	117	0	0	150	42	0	0	19	3	0	0	7	4	6	3	1	1	20	1	19	2	106	38	0	0	9	2	998	224	1148	422	8114	4821
0.081	15852	2189	60638	1423	13609	832	0	0	484	958	3617	276	3917	104	0	0	171	46	0	0	20	3	0	0	7	4	8	3	1	1	25	2	21	2	118	42	0	0	7	2	929	216	1257	324	15353	7423
0.082	14822	2067	54675	1301	12394	773	0	0	0	0	2835	219	3705	98	0	0	200	46	0	0	20	3	0	0	7	4	7	3	1	1	21	2	21	2	118	42	0	0	8	2	1040	235	1160	303	10930	5462
0.083	18025	2380	67453	1561	13282	827	0	0	0	0	3360	258	3264	92	0	0	178	46	0	0	20	3	0	0	8	4	8	4	0	1	30	2	21	2	124	44	0	0	7	2	969	224	1543	350	12294	6102
0.084	18132	2411	70681	1625	11965	1337	0	0	0	0	2440	239	3184	152	0	0	126	86	0	0	18	6	0	0	11	8	7	7	0	0	26	3	24	4	134	52	0	0	8	5	1046	313	1788	367	13787	6754
0.085	14514	2065	56610	1340	12273	771	0	0	0	0	2203	175	3658	98	0	0	185	45	0	0	19	3	0	0	9	4	7	3	1	0	25	2	19	2	113	40	0	0	6	2	920	213	1145	301	12176	5996
0.086	14804	2071	55681	1321	9950	903	0	0	0	0	1876	169	3663	125	0	0	133	56	0	0	16	4	0	0	3	5	2	4	1	1	19	2	17	2	91	35	0	0	7	3	797	216	1100	293	11115	5543
0.087	15221	2153	60656	1424	12476	787	0	0	0	0	2300	182	4515	115	0	0	181	46	1	31	21	3	0	0	6	4	5	3	1	1	26	2	19	2	120	43	0	0	10	3	951	220	1456	331	16742	8035
0.088	14496	2065	57521	1356	10883	720	0	0	694	922	1763	143	3187	89	0	0	172	43	0	0	19	3	0	0	7	4	6	3	0	0	25	2	19	2	112	40	0	0	9	3	949	217	1095	296	10965	5459
0.089	14297	2045	56183	1331	10975	719	0	0	0	0	1744	142	4048	105	0	0	159	43	3	28	19	3	0	0	5	4	6	3	1	0	24	2	18	2	107	38	0	0	6	2	902	207	1249	302	11422	5663
0.09	15174	2119	59113	1388	10665	708	0	0	43	907	1952	157	3987	104	0	0	183	44	0	0	16	3	0	0	6	4	5	3	1	0	20	1	18	2	107	39	0	0	6	2	928	214	1447	320	8109	4273
0.091	16762	2236	60441	1419	6747	558	0	0	1077	912	1925	155	4246	109	0	0	179	44	0	0	17	3	0	0	6	4	4	3	1	1	31	2	19	2	105	38	0	0	9	2	1098	244	1450	314	13088	6427
0.092	19867	2527	73171	1673	4243	471	0	0	837	946	2344	185	4912	121	0	0	239	51	0	0	19	3	0	0	10	4	8	3	1	1	37	2	19	2	115	41	0	0	6	2	1044	234	1555	329	8038	4334
0.093	18580	2420	69630	1603	4150	456	0	0	162	910	2216	176	5815	137	0	0	185	45	0	0	16	3	0	0	4	4	6	3	0	1	31	2	17	2	99	36	0	0	7	2	992	224	1089	297	11586	5804
0.094	17921	2372	68605	1582	4582	481	3244	161	0	0	2504	197	6551	150	0	0	203	48	0	0	16	3	0	0	9	4	8	3	0	1	32	2	18	2	119	43	0	0	9	3	1199	264	989	295	10330	5250
0.095	15702	2545	56339	1482	5620	502	0	0	0	0	2672	207	6635	150	0	0	226	46	0	0	15	3	0	0	6	4	7	3	0	1	27	2	16	2	107	39	0	0	12	3	1051	233	991	355	9388	5145
0.096	16006	2233	65314	1516	9182	664	3240	165	0	0	2807	219	6464	150	0	0	232	49	0	0	17	3	0	0	8	4	8	4	1	1	24	2	18	2	119	43	0	0	9	2	1058	240	1195	317	11931	5915
0.097	15632	2161	59805	1405	13233	813	0	0	0	0	2900	225	4821	120	0	0	135	42	7	31	18	3	0	0	7	4	15	4	1	1	26	2	21	2	114	41	0	0	7	2	1026	234	1272	320	11642	5777
0.098	13525	2024	58828	1381	13674	824	0	0	0	0	2999	231	3799	101	0	0	213	46	2	32	18	3	0	0	5	4	7	3	1	1	31	2	22	2	112	40	0	0	8	2	1040	236	1230	315	9127	4662
0.099	13242	1974	54964	1305	12861	791	0	0	0	0	2264	179	3261	90	0	0	177	44	0	0	18	3	0	0	7	4	4	3	0	1	29	2	21	2	115	41	0	0	8	2	857	201	1251	306	12048	5925
0.1	13196	1979	56504	1334	11321	732	0	0	287	897	1655	135	2933	84	0	0	163	42	0	0	19	3	0	0	6	4	4	3	1	0	29	2	22	2	110	39	0	0	5	2	982	224	1160	298	10377	5198
0.101	13474	2004	57099	1347	10990	721	0	0	462	907	1295	110	3719	99	0	0	146	42	0	0	18	3	0	0	6	4	7	3	1	1	29	2	19	2	111	40	0	0	9	2	810	190	1087	295	11374	5635
0.102	18360	2423	70930	1629	11960	777	0	0	0	0	1671	139	3839	104	0	0	195	47	0	0	19	3	0	0	10	4	8	3	2	1	31	2	21	2	125	45	0	0	8	2	999	230	1665	356	11497	5753
0.103	15369	2232	69850	1605	11226	745	0	0	38	955	1555	130	3225	91	0	0	158	44	6	29	22	3	0	0	12	4	7	3	1	1	34	2	26	2	119	42	0	0	7	2	929	216	1589	347	9746	4965
0.104	14248	2118	64755	1501	10994	731	0	0	0	0	1476	124	3483	96	0	0	178	44	2	29	20	3	0	0	7	4	5	3	1	1	31	2	19	2	115	41	0	0	8	2	967	223	1322	319	12430	6116
0.105	14426	2134	65272	1512	9995	692	0	0	0	0	1194	104	3410	94	0	0	125	41	0	0	20	3	0	0	6	4	6	3	2	0	28	2	22	2	104	38	0	0	6	2	794	188	1368	320	13425	6547
0.106	13246	2181	50368	1300	8165	596	0	0	39	858	1684	137	3661	96	0	0	158	41	0	0	17	3	0	0	4	3	4	3	1	0	20	1	17	1	93	34	0	0	8	2	879	201	972	318	7332	4119
0.107	16082	2230	65104	1511	8657	639	0	0	392	919	2680	209	5057	124	0	0	179	45	0	0	19	3	0	0	8	4	9	3	2	1	19	2	20	2	119	43	0	0	8	2	977	224	1267	315	11078	5542
0.108	15484	2306	59438	1451	11098	729	0	0	349	936	2234	177	4024	105	0	0	167	43	0	0	18	3	0	0	10	4	8	3	1	1	22	2	21	2	123	44	0	0	8	2	1033	234	1156	339	11978	6028
0.109	17237	2395	75093	1714	11235	756	0	0	470	931	1945	158	3301	94	0	0	194	47	6	30	19	3	0	0	4	4	6	3	1	1	26	2	24	2	111	40	0	0	7	2	847	201	1487	351	18092	8669
0.11	14981	2179	66991	1546	9713	682	0	0	0	0	1321	112	2846	83	0	0	161	43	14	27	20	3	0	0	9	4	6	3	1	0	23	2	22	2	100	36	0	0	6	2	907	209	1371	323	12049	5962
0.111	16509	2303	70774	1623	10186	705	0	0	0	0	1167	102	3055	88	0	0	155	42	0	0	19	3	0	0	8	4	5	3	2	0	26	2	23	2	111	40	0	0	5	2	1006	229	1282	327	10927	5481
0.112	15910	2244	67790	1564	9677	683	0	0	57	931	1075	95	3627	99	0	0	149	42	3	27	19	3	0	0	7	4	6	3	1	1	26	2	20	2	113	40	0	0	7	2	897	209	1216	317	13753	6712
0.113	14547	2147	65232	1512	10034	690	0	0	341	912	1027	92	3723	100	0	0	150	41	16	26	19	3	0	0	9	4	7	3	2	1	25	2	18	2	106	38	0	0	8	2	962	220	1395	326	10704	5366
0.114	13659	2045	60038	1406	11152	732	0	0	355	937	886	82	3473	95	0	0	152	42	14	26	20	3	0	0	8	4	7	3	2	0	31	2	20	2	106	38	0	0	7	2	908	210	1204	309	12985	6346
0.115	8321	2810	35557	1380	9337	623	0	0	100	820	809	73	3045	82	0	0	156	38	0	22	16	2	0	0	8	3	7	3	1	0	20	1	18	1	91	33	0	0	6	2	762	177	467	461	4743	4052
0.116	13935	2048	58149	1372	12461	782	0	0	0	0	1757	144	4496	114	0	0	132	42	3	29	20	3	0	0	9	4	8	3	2	1	22	2	22	2	113	41	0	0	6	2	941	216	1235	314	14528	7034
0.117	13642	1989	54473	1297	9818	671	0	0	415	895	2148	170	4819	118	0	0	144	42	8	29	17	3	0	0	5	4	4	3	1	1	19	1	21	2	113	41	0	0	8	2	979	222	962	285	9949	5026
0.118	14874	2074	54726	1304	9960	679	0	0	0	0	2228	176	4821	119	0	0	176	43	2	29	18	3	0	0	8	4	6	3	1	1	20	1	21	2	114	41	0	0	9	2	1053	237	1047	291	12808	6271
0.119	14848	2113	59816	1403	11336	738	0	0	262	917	2338	184	3753	100	0	0	159	42	0	0	18	3	0	0	11	4	8	3	1	1	22	2	23	2	114	41	0	0	7	2	1133	254	1192	310	11303	5627
0.12	13568	2006	56601	1339	13447	815	0	0	0	0	2555	200	3233	90	0	0	198	46	4	32	20	3	0	0	6	4	7	3	1	0	27	2	22	2	108	39	0	0	6	2	930	215	1139	302	11827	5834
0.121	13630	2012	57114	1348	8686	781	0	0	762	1110	1458	132	3085	104	0	0	48	48	8	34	14	3	0	0	4	4	4	4	1	1	20	2	18	2	104	38	0	0	4	3	829	215	1046	287	10969	5461
0.122	14715	2070	55864	1326	10128	689	0	0	398	904	1781	145	3613	97	0	0	199	45	0	0	19	3	0	0	7	4	9	3	1	0	20	1	22	2	116	42	0	0	6	2	1038	235	1408	312	12596	6180
0.123	14586	2050	55104	1308	10451	700	0	0	417	912	1725	140	3195	89	0	0	165	43	0	0	19	3	0	0	5	4	12	3	1	0	19	1	29	2	118	42	0	0	6	2	987	224	1022	290	11283	5610
0.124	14393	2077	58564	1379	11779	757	3247	165	211	910	1549	130	6569	152	0	0	152	43	0	0	19	3	0	0	11	4	24	4	1	1	27	2	20	2	119	43	0	0	7	2	894	208	1505	333	10999	5487
0.125	12574	2015	58958	1401	9455	679	13484	202	0	0	1199	112	20036	387	0	0	141	42	8	28	24	3	0	0	20	6	67	7	0	0	36	2	10	2	138	53	0	0	28	4	558	145	1309	340	14650	7102
0.126	11969	1989	58997	1405	7899	619	19399	236	0	0	1062	107	26785	503	0	0	104	40	0	0	18	3	0	0	24	7	102	9	0	0	42	2	1	2	143	57	0	0	29	5	361	109	1537	363	16622	7984
0.127	12226	2241	84559	1915	10485	757	20024	249	0	0	1527	139	23757	457	0	0	86	42	5	32	20	4	0	0	24	7	66	8	0	0	67	3	0	2	149	58	0	0	28	5	377	118	1771	407	18385	8790
0.128	13923	2436	98894	2196	16011	983	13406	224	0	0	1837	159	17940	360	0	0	135	48	1	34	14	4	0	0	24	7	24	6	0	0	111	4	0	0	154	58	0	0	21	4	394	127	1963	437	20218	9616
0.129	19039	2590	82559	1877	19820	1111	12846	212	0	0	1977	169	18765	374	0	0	152	48	0	0	14	5	0	0	23	7	23	6	0	0	136	4	0	0	141	54	0	0	30	4	478	140	2117	434	14421	7087
0.13	19135	2618	85084	1926	20490	1137	11937	210	0	0	1940	166	17775	357	1	2	136	49	0	0	12	5	0	0	22	7	17	5	0	0	150	4	0	0	136	52	0	0	24	4	316	116	2324	450	15490	7555
0.131	11077	2162	84724	1907	16885	990	11553	204	0	0	1682	147	16883	339	0	0	88	41	0	0	11	4	0	0	20	6	20	5	0	0	134	4	1	2	134	51	0	0	21	4	365	118	1790	400	13777	6692
0.132	11881	2209	86216	1936	13389	857	10174	205	0	0	1464	131	15505	314	0	0	150	46	0	0	12	4	0	0	27	7	26	5	0	0	110	4	0	0	136	51	0	0	18	4	391	120	1777	392	14892	7193
0.133	10246	1972	67038	1558	10699	734	15832	217	0	0	1084	107	22922	438	0	2	106	41	11	27	17	4	0	0	22	6	84	8	0	0	57	3	1	2	137	53	0	0	28	4	345	110	1366	355	14503	7011
0.134	10529	1735	42990	1082	9804	678	18651	220	0	0	876	93	26439	495	0	0	102	39	0	0	15	3	0	0	21	6	158	10	0	0	58	3	1	2	133	53	0	0	32	4	388	114	1359	337	11803	5835
0.135	12470	1911	48610	1196	14058	846	12981	201	0	0	1370	124	21332	409	0	0	128	42	0	0	22	4	0	0	19	6	76	7	0	0	79	3	0	2	136	53	0	0	33	4	444	126	1474	354	15797	7615
0.136	11658	1882	53798	1286	13897	834	6144	170	0	0	2038	166	10406	220	0	0	151	44	6	30	15	3	0	0	9	4	23	5	1	1	60	2	11	2	116	43	0	0	10	3	647	163	1550	342	11886	5845
0.137	14094	2027	55529	1318	10268	692	0	0	0	0	1800	146	4072	105	0	0	122	39	4	28	19	3	0	0	8	4	10	3	1	0	24	2	23	2	111	40	0	0	6	2	962	220	1159	302	12691	6218
0.138	14035	2005	53857	1283	8974	638	0	0	474	886	1556	128	4307	109	0	0	167	42	0	0	17	3	0	0	10	4	10	3	1	0	20	1	23	2	111	40	0	0	7	2	954	217	1101	294	10010	5040
0.139	14650	2028	52290	1253	8385	613	0	0	0	0	1421	119	4235	107	0	0	177	42	14	26	18	3	0	0	6	4	5	3	1	0	18	1	23	2	106	38	0	0	8	2	1077	240	1098	291	11256	5600
0.14	14242	2005	52327	1254	6074	521	3016	155	0	0	3346	255	4527	112	0	0	163	41	0	0	18	3	0	0	9	4	6	3	1	1	25	2	21	2	127	45	0	0	8	2	1072	238	1155	294	10364	5201
0.141	13352	1943	52061	1247	4636	919	0	0	0	0	2011	208	3497	162	0	0	107	71	3	49	14	5	0	0	1	6	4	6	0	1	18	3	12	3	94	39	0	6	6	4	768	260	1128	281	10270	5148
0.142	13311	1940	51550	1236	9575	658	0	0	0	0	1770	143	4191	107	0	0	130	39	2	26	17	3	0	0	3	3	6	3	1	0	18	1	20	2	102	37	0	0	7	2	989	223	966	285	10658	5309
0.143	13584	1969	49051	1199	8707	621	0	0	0	0	1136	99	4814	118	0	0	176	43	11	25	18	3	0	0	12	4	8	3	2	0	17	1	19	2	106	38	0	0	9	2	943	214	981	291	11634	5768
0.144	13581	1948	51017	1225	9323	647	0	0	292	874	1328	112	3691	97	0	0	168	41	3	26	18	3	0	0	6	4	5	3	1	0	21	1	21	2	109	39	0	0	8	2	891	204	964	285	10526	5265
0.145	12739	1907	52110	1246	9156	642	0	0	316	896	1118	97	2664	77	0	0	127	38	18	24	19	3	0	0	5	3	4	3	1	0	22	1	22	2	101	36	0	0	5	2	771	182	780	275	9996	5016
0.146	13850	2015	56190	1328	8383	617	0	0	389	880	1018	90	2750	80	0	0	160	40	0	24	20	3	0	0	8	4	5	3	1	0	22	1	28	2	97	35	0	0	4	2	906	208	854	282	11531	5698
0.147	14649	2074	58229	1368	5311	1172	0	0	0	0	663	118	1411	121	0	0	109	81	13	45	12	5	0	0	5	6	6	6	1	1	12	3	14	3	63	29	2	6	2	4	528	242	929	276	9617	4876
0.148	13878	2038	58581	1376	9079	648	0	0	588	888	963	86	2692	79	0	0	142	39	11	24	19	3	0	0	6	3	5	3	1	0	21	1	29	2	96	34	0	0	6	2	858	200	935	291	11847	5849
0.149	14906	2121	61084	1428	8661	635	0	0	0	0	813	76	2561	77	0	0	152	40	16	25	20	3	0	0	8	4	5	3	1	0	22	1	27	2	106	38	0	0	6	2	975	222	977	293	12426	6117
0.15	15023	2117	60409	1412	9587	669	0	0	0	0	871	80	2935	84	0	0	128	39	11	26	20	3	0	0	8	4	6	3	1	0	25	2	22	2	112	40	0	0	6	2	973	222	1024	295	8765	4526
0.151	14989	2082	54571	1302	14759	865	0	0	817	916	5082	379	4332	111	0	0	171	44	0	0	21	3	0	0	8	4	7	4	1	1	28	2	20	2	115	42	0	0	9	3	1033	234	976	309	13456	6571
0.152	14965	2078	54148	1295	15347	887	0	0	452	921	5915	438	4610	116	0	0	158	43	0	0	19	3	0	0	13	5	8	4	0	1	28	2	18	2	132	47	0	0	12	3	924	214	1208	319	13198	6459
0.153	15940	2177	59412	1398	11467	744	0	0	0	0	4034	304	4018	104	0	0	141	42	0	0	18	3	0	0	6	4	6	3	1	1	23	2	22	2	110	40	0	0	6	2	916	211	1023	305	12655	6237
0.154	14893	2071	55860	1323	10402	696	0	0	1066	895	2777	215	3104	86	0	0	119	40	3	31	18	3	0	0	6	4	6	3	1	0	21	1	23	2	109	39	0	0	5	2	951	218	637	278	9942	5029
0.155	16180	2218	63304	1474	9094	654	0	0	319	901	2080	166	2883	83	0	0	182	44	1	29	18	3	0	0	8	4	8	3	1	0	24	2	28	2	115	41	0	0	5	2	966	222	1216	308	11136	5577
0.156	16526	2261	65495	1519	9700	684	0	0	437	938	1636	135	2904	84	0	0	181	44	2	28	20	3	0	0	8	4	6	3	0	1	28	2	29	2	101	36	0	0	9	2	975	223	1313	319	13836	6752
0.157	451	314	63	87	6522	461	0	0	304	634	905	76	1702	51	0	0	123	29	0	0	12	2	0	0	5	2	3	2	0	0	18	1	17	1	68	24	0	0	4	1	634	146	8	30	0	0
0.158	16199	2240	66276	1530	1758	776	0	0	0	0	169	67	233	63	0	2	5	12	14	16	3	3	0	0	4	3	2	2	0	0	6	2	2	2	11	10	0	0	3	2	202	154	926	276	13474	6578
0.159	16412	2270	68157	1571	8482	637	0	0	1047	938	1208	104	2602	78	0	0	150	42	7	27	19	3	0	0	12	4	6	3	1	0	29	2	26	2	113	40	0	0	7	2	905	210	1094	306	11823	5879
0.16	17408	2320	66882	1545	8432	632	0	0	415	931	1524	127	3525	96	0	0	157	41	12	27	20	3	0	0	9	4	6	3	1	1	25	2	21	2	113	41	0	0	7	2	965	220	1156	306	8914	4640
0.161	16660	2252	63196	1474	9995	692	0	0	651	947	2941	227	4888	121	0	0	146	42	9	31	21	3	0	0	9	4	9	4	0	1	24	2	25	2	121	44	0	0	12	3	1161	259	907	301	10732	5395
0.162	18526	2396	66134	1535	8842	650	0	0	542	948	3216	247	5719	136	0	0	166	44	5	33	18	3	0	0	5	4	9	4	1	1	19	2	23	2	124	45	0	0	10	2	1079	243	1202	314	10784	5448
0.163	17373	2319	65340	1519	9527	677	0	0	837	948	3148	242	5521	133	0	0	162	43	2	32	19	3	0	0	7	4	11	4	1	1	20	2	22	2	124	45	0	0	11	3	1099	247	895	304	13101	6442
0.164	16599	2254	63457	1480	10602	716	0	0	0	0	3148	242	4992	123	0	0	156	42	0	0	18	3	0	0	10	4	9	3	2	1	22	2	22	2	123	44	0	0	8	2	988	226	1084	309	12481	6160
0.165	17078	2302	66224	1534	10666	721	0	0	650	941	3075	237	3493	95	0	0	178	46	18	33	19	3	0	0	6	4	8	3	1	1	23	2	22	2	124	44	0	0	7	2	989	228	1167	316	11828	5878
0.166	15191	2122	59709	1400	8782	635	0	0	710	903	2331	183	3423	93	0	0	194	45	0	0	19	3	0	0	6	4	4	3	2	0	20	1	21	2	111	40	0	0	6	2	1034	233	1062	292	8513	4429
0.167	15968	2176	59493	1399	9049	649	0	0	733	899	2154	171	3330	91	0	0	177	44	1	29	19	3	0	0	9	4	7	3	1	0	21	1	21	2	119	42	0	0	5	2	1080	243	856	286	13221	6474
0.168	15822	2169	59510	1400	9298	662	0	0	445	936	2840	220	4055	105	0	0	159	43	0	0	19	3	0	0	9	4	7	3	1	1	22	2	22	2	113	41	0	0	6	2	1038	234	919	290	13629	6651
0.169	17512	2321	64122	1495	9650	681	0	0	57	957	3362	257	5058	124	0	0	164	44	0	33	19	3	0	0	11	4	15	4	2	1	22	2	22	2	124	45	0	0	6	2	1089	245	1105	312	14939	7261
0.17	14794	2276	49718	1296	7130	560	0	0	554	881	2592	201	4753	116	0	0	190	43	0	0	18	3	0	0	6	4	7	3	1	1	18	1	22	2	111	40	0	0	9	2	1010	227	996	322	8285	4562
0.171	15917	2182	59961	1409	8909	646	0	0	673	918	2563	200	4656	116	0	0	145	42	12	30	21	3	0	0	8	4	12	4	2	1	20	1	22	2	127	45	0	0	9	2	1047	237	1027	302	13531	6618
0.172	13433	1981	55145	1307	9766	691	0	0	937	921	1432	121	2735	82	0	0	148	41	0	0	18	3	0	0	10	4	8	3	1	0	25	2	20	2	104	37	0	0	6	2	995	228	952	289	10651	5310
0.173	12375	1864	49440	1193	9025	631	0	0	0	0	825	77	4801	117	0	0	100	36	7	22	16	3	0	0	10	4	9	3	2	0	24	1	19	2	109	39	0	0	9	2	731	174	859	269	10346	5162
0.174	12586	1891	50785	1221	9501	654	0	0	307	869	945	86	4833	118	0	0	153	39	9	24	19	3	0	0	10	4	10	3	3	1	20	1	20	2	104	38	0	0	9	2	941	215	886	275	11197	5545
0.175	13144	1973	55728	1319	9228	648	0	0	0	0	1050	93	3995	103	0	0	133	39	3	24	17	3	0	0	12	4	12	3	2	0	21	1	19	2	114	41	0	0	8	2	769	182	1026	289	11295	5588
0.176	12808	1912	51571	1236	8756	624	0	0	0	0	1104	96	3911	101	0	0	181	41	2	25	16	3	0	0	10	4	10	3	2	0	19	1	18	2	117	42	0	0	8	2	913	209	749	267	11707	5759
0.177	15382	2157	61272	1434	9521	672	0	0	505	933	1034	92	3484	95	0	0	178	44	0	0	19	3	0	0	12	4	7	3	1	1	21	1	23	2	119	42	0	0	8	2	915	211	1146	305	14023	6819
0.178	14646	2108	61430	1434	9107	653	0	0	253	919	985	88	3464	94	0	0	141	40	0	0	19	3	0	0	10	4	8	3	2	0	22	1	22	2	114	41	0	0	8	2	956	219	1160	303	10998	5476
0.179	14216	2073	60458	1414	7791	598	0	0	717	905	870	80	3310	91	0	0	155	40	18	24	18	3	0	0	8	4	9	3	1	1	18	1	19	2	104	37	0	0	10	2	879	203	860	285	10487	5270
0.18	14232	2072	59921	1404	9229	656	0	0	0	0	802	75	3467	94	0	0	170	42	2	25	20	3	0	0	8	4	8	3	2	0	24	2	20	2	120	43	0	0	7	2	881	204	1132	299	11912	5873
0.181	13299	2003	57651	1359	10396	700	0	0	569	902	862	80	4310	110	0	0	172	43	0	0	17	3	0	0	10	4	9	3	2	1	28	2	19	2	124	44	0	0	9	2	840	198	1201	306	13520	6575
0.182	13233	1987	56693	1339	9572	664	0	0	106	880	804	75	3563	96	0	0	154	40	7	24	17	3	0	0	8	4	9	3	3	0	26	2	17	2	112	40	0	0	7	2	791	187	1068	295	12526	6139
0.183	11716	1901	57245	1347	9182	646	0	0	0	0	726	70	3409	93	0	0	151	40	2	24	17	3	0	0	8	4	8	3	1	1	31	2	20	2	111	40	0	0	9	2	778	184	982	287	10161	5084
0.184	13168	2015	60423	1412	10885	719	0	0	0	0	936	85	3734	100	0	0	124	40	10	25	19	3	0	0	8	4	6	3	1	1	32	2	18	2	115	41	0	0	9	2	745	179	1088	300	10684	5327
0.185	13954	2007	54052	1288	10133	685	0	0	451	897	2474	193	4010	103	0	0	136	40	1	30	18	3	0	0	7	4	9	3	2	1	24	2	20	2	114	41	0	0	8	2	953	218	799	280	12191	5995
0.186	15654	2165	59682	1403	10757	721	0	0	995	957	2940	227	3759	100	0	0	173	44	0	0	19	3	0	0	7	4	6	3	1	1	24	2	23	2	121	43	0	0	7	2	947	218	1065	307	14606	7088
0.187	15245	2087	54656	1302	10158	688	0	0	413	897	2889	223	3729	98	0	0	192	45	0	0	20	3	0	0	10	4	8	3	1	1	22	1	20	2	116	42	0	0	7	2	1034	233	1011	290	11609	5756
0.188	16339	2220	61603	1442	9266	661	0	0	848	924	2869	222	4162	107	0	0	179	44	8	31	18	3	0	0	12	4	12	4	1	1	20	2	22	2	120	43	0	0	10	3	1078	243	1081	306	13236	6493
0.189	17539	2297	62319	1457	7795	604	0	0	124	934	2297	181	4559	114	0	0	244	48	0	0	19	3	0	0	6	4	8	3	1	1	18	1	20	2	125	45	0	0	9	2	1002	227	1112	304	11228	5639
0.19	15644	2120	55551	1319	8280	614	0	0	131	901	2426	190	4741	117	0	0	204	45	0	0	18	3	0	0	7	4	8	3	1	1	18	1	20	2	111	40	0	0	9	2	1007	228	1041	287	11648	5767
0.191	16165	2204	61702	1442	9379	665	0	0	187	932	2406	189	3460	94	0	0	167	43	3	30	17	3	0	0	8	4	10	3	1	1	20	1	20	2	119	42	0	0	8	2	973	222	1140	306	10848	5437
0.192	15697	2176	61342	1434	9098	657	0	0	959	930	1901	153	2847	82	0	0	169	46	23	31	18	3	0	0	7	4	5	3	1	0	22	1	29	2	107	38	0	0	4	2	967	222	1131	307	13114	6420
0.193	16057	2181	59878	1405	8396	624	0	0	829	920	2081	166	3886	102	0	0	174	45	0	0	17	3	0	0	7	4	9	3	1	0	19	1	19	2	112	40	0	0	6	2	1006	229	1133	303	10076	5100
0.194	13521	1964	52680	1259	9786	666	0	0	92	870	2748	213	4301	108	0	0	168	41	0	0	17	3	0	0	10	4	18	4	1	1	20	1	20	2	117	42	0	0	7	2	1044	234	904	280	11008	5474
0.195	15458	2144	59512	1398	9697	677	0	0	498	934	2515	197	4074	106	0	0	145	42	0	0	19	3	0	0	7	4	10	4	1	1	21	1	21	2	111	40	0	0	9	2	1067	241	1297	312	10994	5509
0.196	16413	2207	59222	1395	9404	667	0	0	243	928	2654	207	3791	100	0	0	158	42	0	0	19	3	0	0	9	4	9	3	2	0	19	1	22	2	112	40	0	0	6	2	1065	240	1021	301	14743	7159
0.197	15099	2118	58795	1384	11561	749	0	0	572	929	2741	213	3224	90	0	0	147	42	3	31	16	3	0	0	10	4	11	4	1	1	27	2	23	2	117	42	0	0	8	2	1012	231	1146	308	12640	6206
0.198	16420	2664	48399	1380	9967	669	0	0	0	0	1956	156	2656	77	0	0	159	40	4	27	18	3	0	0	9	4	4	3	0	0	27	2	20	2	104	37	0	0	6	2	926	211	988	390	5010	3783
0.199	15301	2130	59638	1398	9070	648	0	0	340	912	1635	134	2763	80	0	0	147	41	0	0	20	3	0	0	6	4	5	3	0	1	28	2	27	2	111	40	0	0	9	2	1007	228	1086	297	9571	4876
0.2	14722	2091	59103	1387	8403	623	0	0	969	917	1633	134	2747	80	0	0	100	39	12	27	19	3	0	0	9	4	7	3	0	0	29	2	27	2	98	35	0	0	6	2	948	217	967	292	9880	4999
0.201	14144	2055	59385	1391	8292	616	0	0	291	895	1441	120	2706	79	0	0	147	40	0	0	18	3	0	0	7	4	6	3	1	0	26	2	25	2	110	39	0	0	8	2	969	221	1091	294	8689	4489
0.202	10591	2564	38743	1300	7234	546	0	0	249	809	1065	91	2723	76	0	0	134	37	4	22	17	2	0	0	10	3	7	3	2	0	22	1	17	1	99	35	0	0	6	2	749	175	696	396	3733	3494
0.203	14791	2089	58612	1378	7831	599	0	0	828	905	1160	100	3697	98	0	0	146	41	0	0	17	3	0	0	9	4	9	3	2	1	27	2	18	2	115	41	0	0	9	2	904	208	1106	295	9708	4927
0.204	1600	3735	11359	1662	6164	460	0	0	285	690	795	69	2623	70	0	0	109	30	0	19	12	2	0	0	5	3	6	2	1	0	20	1	12	1	74	26	0	0	6	1	685	156	0	0	0	0
0.205	14103	2046	58300	1371	7889	599	0	0	407	900	1065	93	2796	81	0	0	150	41	3	26	19	3	0	0	7	4	7	3	1	0	28	2	20	2	110	39	0	0	5	2	819	193	974	284	9877	4984
0.206	15957	2180	60892	1425	7740	596	0	0	0	0	2269	179	3815	100	0	0	163	42	0	0	20	3	0	0	9	4	22	4	1	1	21	1	21	2	105	38	0	0	8	2	874	201	1089	296	8895	4596
0.207	15879	2178	60316	1416	8286	619	0	0	311	906	2856	221	4708	117	0	0	152	41	0	0	18	3	0	0	8	4	9	3	2	1	20	1	19	2	113	41	0	0	7	2	981	222	979	296	11838	5876
0.208	16328	2219	62130	1452	8518	632	0	0	656	927	2845	220	4597	115	0	0	107	40	0	0	18	3	0	0	9	4	8	3	2	1	22	2	20	2	115	42	0	0	8	2	1043	236	1199	308	11337	5648
0.209	16454	2234	62353	1457	7955	609	0	0	0	0	2240	177	4878	120	0	0	180	43	0	0	18	3	0	0	5	4	9	3	1	1	19	1	21	2	111	40	0	0	9	2	1081	243	952	297	13421	6579
0.21	16625	2241	63598	1478	8528	632	0	0	188	926	2141	170	3572	96	0	0	149	42	43	32	18	3	0	0	6	4	6	3	1	1	24	2	21	2	110	39	0	0	7	2	906	211	893	293	7386	4002
0.211	16977	2270	63925	1486	7635	602	0	0	282	937	1772	144	3043	86	0	0	179	44	6	29	20	3	0	0	6	4	4	3	1	1	24	2	22	2	112	40	0	0	9	2	1082	244	989	297	10407	5270
0.212	17150	2301	66129	1531	7890	613	0	0	1060	943	1431	120	3006	86	0	0	156	43	0	0	20	3	0	0	8	4	6	3	0	1	26	2	30	2	104	37	0	0	8	2	994	226	1070	304	11603	5782
0.213	16824	2293	68172	1570	6764	582	0	0	726	956	991	90	3220	92	0	0	150	42	1	27	20	3	0	0	8	4	6	3	1	0	26	2	19	2	97	35	0	0	7	2	933	216	908	295	10457	5276
0.214	14706	2497	55310	1465	6665	543	0	0	558	866	927	83	2609	76	0	0	158	40	0	0	17	3	0	0	5	3	8	3	1	0	26	1	19	1	102	36	0	0	7	2	865	200	769	354	6958	4194
0.215	15996	2233	66180	1531	8984	658	0	0	706	953	1102	97	3071	88	0	0	164	43	0	0	20	3	0	0	7	4	6	3	0	1	35	2	20	2	112	40	0	0	7	2	931	215	1052	304	13034	6396
0.216	15004	2069	55440	1313	5248	1106	0	0	0	0	796	130	2108	145	0	0	52	76	27	45	12	5	0	0	2	6	2	5	0	0	16	3	11	3	59	28	1	5	9	5	586	251	878	267	9693	4926
0.217	17054	2239	58813	1387	6193	533	0	0	153	924	2133	169	3986	103	0	0	174	43	0	0	20	3	0	0	9	4	8	3	1	0	18	1	20	2	102	37	0	0	8	2	1033	232	1068	293	12490	6177
0.218	4539	1286	17640	629	3323	354	0	0	0	0	1424	114	2447	67	0	0	101	29	0	0	11	2	0	0	4	3	7	2	0	0	11	1	12	1	67	24	0	0	5	2	563	135	750	264	8148	4203
0.219	809	691	8776	343	3207	338	0	0	0	0	845	72	1868	55	0	0	42	23	4	17	8	2	0	0	4	2	3	2	1	0	8	1	10	1	66	24	0	0	2	1	316	86	710	207	10787	5157
0.22	593	621	7080	302	2260	288	0	0	0	0	558	51	1361	44	0	1	42	21	8	15	6	1	0	0	4	2	3	2	0	0	6	1	7	1	63	23	0	0	4	1	255	73	768	200	8738	4215
0.221	545	652	7779	319	1786	263	0	0	0	0	322	34	756	31	0	1	22	19	17	15	3	1	0	0	3	2	3	2	0	0	4	1	5	1	53	19	0	0	3	1	137	53	789	206	10788	5149
0.222	613	657	7853	321	1443	242	0	0	0	0	146	20	370	21	0	0	13	16	17	13	4	1	0	0	4	2	4	2	0	0	3	1	3	1	53	19	0	0	2	1	106	45	626	197	11773	5595
0.223	463	623	7149	303	1112	232	0	0	0	0	94	16	280	18	0	1	12	16	23	14	3	1	0	0	5	2	4	2	0	0	3	1	3	1	56	20	0	0	2	1	34	36	717	195	10322	4928
0.224	209	652	7985	323	588	387	0	0	0	0	48	22	146	30	0	1	35	25	49	28	1	2	0	0	5	4	1	2	0	0	1	1	2	1	37	16	1	3	1	1	91	60	841	207	10221	4896
0.225	478	644	7619	315	832	215	0	0	0	0	28	10	134	13	0	1	19	17	9	11	2	1	0	0	4	2	2	2	0	0	2	1	1	1	53	19	0	0	2	1	0	0	798	204	9947	4768
0.226	219	640	7799	318	747	205	0	0	0	0	21	9	96	11	0	1	4	13	14	12	2	1	0	0	4	2	3	2	0	0	2	0	1	1	51	18	0	0	2	1	15	33	790	203	9589	4604
0.227	506	659	7882	322	839	210	0	0	0	0	11	8	87	11	0	1	1	14	10	12	1	1	0	0	2	2	2	2	0	0	1	0	1	1	52	18	0	0	2	1	41	35	793	206	12209	5796
0.228	360	647	7763	318	796	207	0	0	0	0	11	8	98	11	0	1	1	14	21	13	1	1	0	0	2	2	2	2	0	0	1	0	1	1	52	18	0	0	3	1	0	0	760	202	10018	4803
0.229	330	638	7705	317	952	217	0	0	0	0	9	8	85	10	0	1	14	15	9	11	1	1	0	0	2	2	2	2	0	0	1	0	0	1	53	19	0	0	2	1	12	33	731	201	8895	4296
0.23	502	641	7495	312	852	215	0	0	0	0	3	7	84	10	0	1	11	15	19	13	0	1	0	0	3	2	3	2	0	0	1	0	0	1	53	19	0	0	2	1	4	34	762	203	10805	5151
0.231	189	944	7137	441	611	196	0	0	0	0	7	7	70	9	0	1	3	13	18	12	0	1	0	0	2	2	2	2	0	0	1	0	0	1	49	18	0	0	2	1	26	32	681	288	6929	3673
0.232	443	660	8130	327	933	218	0	0	0	0	14	9	89	11	0	1	12	16	16	13	0	1	0	0	2	2	2	2	0	0	1	0	0	1	53	19	0	0	2	1	0	0	707	200	11087	5283
0.233	705	669	8227	329	826	213	0	0	0	0	6	7	78	10	0	1	7	15	15	12	1	1	0	0	2	2	2	2	0	0	1	0	1	1	53	19	0	0	1	1	28	34	793	205	11063	5278
0.234	614	663	7996	323	688	208	0	0	0	0	6	8	86	11	0	1	8	15	11	12	1	1	0	0	4	2	2	2	0	0	1	0	1	1	54	19	0	0	1	1	3	34	899	210	10965	5231
0.235	426	645	7872	320	759	209	0	0	0	0	9	8	78	10	0	0	11	15	12	12	1	1	0	0	3	2	3	2	0	0	1	0	0	1	52	19	0	0	2	1	15	34	780	202	8614	4173
0.236	467	644	7660	316	702	204	0	0	0	0	12	8	67	10	1	1	8	15	23	13	1	1	0	0	2	2	3	2	0	0	1	0	0	1	55	20	0	0	2	1	25	34	787	203	9560	4596
0.237	481	658	7966	323	774	210	0	0	0	0	6	8	72	10	1	1	0	0	12	12	1	1	0	0	4	2	4	2	0	0	0	0	0	1	54	19	0	0	2	1	18	33	819	206	11109	5296
0.238	515	655	7977	323	538	194	0	0	0	0	3	7	71	10	0	1	1	14	14	12	1	1	0	0	3	2	3	2	0	0	1	0	0	1	51	18	0	0	1	1	24	33	788	204	10834	5171
0.239	326	673	7026	326	737	207	0	0	0	0	8	8	70	9	0	1	0	0	4	10	1	1	0	0	3	2	2	2	0	0	1	0	0	1	52	19	0	0	2	1	1	35	615	206	7452	3676
0.24	472	642	7550	313	599	201	0	0	0	0	11	8	75	10	0	1	4	14	11	12	1	1	0	0	3	2	2	2	0	0	1	0	0	1	54	19	0	0	2	1	3	33	714	198	10605	5065
0.241	401	611	6969	298	625	200	0	0	0	0	3	7	77	10	0	1	0	0	16	12	1	1	0	0	3	2	2	2	0	0	1	0	0	1	57	20	0	0	2	1	9	33	632	189	8639	4163
0.242	506	628	7395	308	658	202	0	0	0	0	7	8	75	10	0	1	0	0	12	12	0	1	0	0	3	2	1	2	0	0	1	0	0	1	53	19	0	0	1	1	12	33	702	196	8683	4197
0.243	578	623	7175	303	544	194	0	0	0	0	11	8	95	11	0	1	12	15	12	11	0	1	0	0	2	2	1	1	0	0	1	0	0	1	48	17	0	0	1	1	0	0	755	195	8640	4173
0.244	14950	2040	51416	1236	4673	456	0	0	0	0	1636	133	3003	83	0	0	121	35	0	0	11	2	0	0	7	3	8	3	1	0	13	1	12	1	89	32	0	0	4	2	754	177	792	264	12457	6132
0.245	18457	2383	65748	1525	8378	640	0	0	225	935	2553	201	4754	120	0	0	130	41	0	0	18	3	0	0	5	4	5	3	1	1	20	2	20	2	102	37	0	0	7	2	1100	249	1251	313	9432	4876
0.246	16373	2206	60212	1412	8538	629	0	0	229	917	1927	155	4558	114	0	0	161	44	0	0	19	3	0	0	7	4	9	3	1	1	18	1	22	2	111	40	0	0	8	2	1009	228	900	284	8991	4650
0.247	18437	2426	71398	1637	9003	658	0	0	225	942	1780	145	4079	107	0	0	153	45	5	31	20	3	0	0	5	4	6	3	1	1	24	2	25	2	109	39	0	0	8	2	1026	233	1164	322	9361	4851
0.248	16005	2322	60957	1472	1932	1001	0	0	1407	1392	255	111	601	130	0	0	0	0	22	27	4	4	0	0	5	4	1	2	0	0	8	3	4	3	19	17	0	3	8	6	0	0	1048	302	9630	5014
0.249	1024	2051	6046	839	5956	448	0	0	421	671	1093	90	2542	67	0	0	123	31	4	20	14	2	0	0	6	3	3	2	1	0	14	1	15	1	72	26	0	0	6	2	683	156	0	0	0	0
0.25	14989	2526	48546	1365	8353	606	0	0	400	866	1789	144	3581	94	0	0	174	41	8	27	20	3	0	0	6	4	5	3	1	1	18	1	22	2	107	38	0	0	8	2	1029	230	929	366	7371	4443
0.251	17688	2334	66526	1538	9167	666	0	0	1064	980	1876	152	3624	98	0	0	198	46	0	0	20	3	0	0	5	4	6	3	1	1	21	1	24	2	116	42	0	0	9	2	1197	266	1231	313	7701	4154
0.252	16623	2264	66179	1529	8377	631	0	0	773	948	1498	125	3238	90	0	0	214	46	7	28	21	3	0	0	7	4	4	3	2	0	24	2	22	2	110	39	0	0	5	2	1149	256	1461	322	7861	4195
0.253	16688	2850	49459	1458	7095	557	0	0	948	864	1195	102	2767	79	0	0	140	39	0	0	19	3	0	0	5	3	4	3	1	0	21	1	26	2	92	33	0	0	7	2	853	196	919	399	5401	4092
0.254	17543	2310	64814	1503	8272	625	0	0	729	928	1786	145	3698	99	0	0	148	43	0	0	22	3	0	0	8	4	5	3	1	0	23	2	23	2	114	41	0	0	6	2	980	223	1203	307	7297	3993
0.255	18603	2382	63834	1489	8443	636	0	0	1037	956	1493	125	4233	109	0	0	193	45	5	29	19	3	0	0	7	4	6	3	2	1	23	2	22	2	118	42	0	0	7	2	1031	234	1256	314	13409	6602
0.256	20231	2480	64243	1494	7834	608	0	0	1216	940	1229	106	3272	91	0	0	194	45	3	28	21	3	0	0	10	4	6	3	1	0	24	2	21	2	124	44	0	0	7	2	1037	234	1187	305	6456	3727
0.257	18271	2362	65762	1523	8451	635	0	0	1029	966	1396	118	3578	97	0	0	171	44	0	0	20	3	0	0	9	4	7	3	1	1	24	2	22	2	127	45	0	0	7	2	1039	235	1302	313	6949	3865
0.258	17998	2348	65544	1519	7627	602	0	0	1238	953	1406	119	3697	99	0	0	197	46	12	28	20	3	0	0	10	4	5	3	1	1	23	2	23	2	112	40	0	0	7	2	1020	233	1319	315	10016	5121
0.259	16779	2201	57419	1356	7654	594	0	0	1356	918	1486	123	3803	100	0	0	193	45	9	28	20	3	0	0	5	4	5	3	1	0	21	1	22	2	106	38	0	0	7	2	1080	241	782	278	8945	4645
0.26	18320	2301	56861	1347	9155	651	0	0	602	910	2243	177	4647	116	0	0	117	41	0	0	19	3	0	0	8	4	6	3	2	0	22	2	23	2	110	40	0	0	7	2	965	219	955	286	8846	4627
0.261	17637	2352	67555	1563	9052	662	0	0	528	953	2240	178	5274	129	0	0	196	46	0	0	20	3	0	0	6	4	6	3	1	1	21	2	23	2	115	41	0	0	10	2	1123	252	1311	320	13553	6644
0.262	16259	2207	60612	1422	8550	633	0	0	429	919	2072	166	4802	119	0	0	172	44	0	0	20	3	0	0	10	4	7	3	2	0	20	1	23	2	109	39	0	0	6	2	1047	237	1045	294	13044	6395
0.263	15303	2135	60213	1410	8905	644	0	0	1094	930	2229	176	4259	109	0	0	191	45	6	30	18	3	0	0	7	4	7	3	0	1	23	2	22	2	114	41	0	0	11	3	1137	253	1023	291	8764	4534
0.264	19283	2474	71521	1639	4949	555	2836	165	899	996	1877	157	4571	125	0	0	185	51	3	33	17	3	0	0	6	4	4	4	1	1	26	2	20	2	93	35	0	0	9	3	956	226	1460	325	6459	3710
0.265	21322	2620	72368	1660	5247	506	0	0	133	927	2299	182	5661	135	0	0	201	46	0	0	19	3	0	0	8	4	6	3	2	1	27	2	22	2	109	39	0	0	9	2	1317	288	1710	341	8573	4572
0.266	20134	2592	77992	1774	7150	598	0	0	200	892	2024	164	5196	129	0	0	246	51	0	0	19	3	0	0	7	4	6	3	1	1	26	2	23	2	113	41	0	0	10	3	1221	272	1688	354	14225	6974
0.267	18164	2472	76942	1753	10728	740	0	0	474	908	2537	200	4632	119	0	0	220	49	5	33	18	3	0	0	12	4	7	4	1	1	25	2	24	2	114	41	0	0	7	2	1056	240	1489	353	18521	8872
0.268	22609	2732	76020	1734	1931	1286	0	0	1077	1897	558	201	959	199	1	4	101	81	4	15	9	7	0	0	8	6	1	2	0	0	8	3	6	4	32	28	2	6	8	5	208	166	1434	326	12382	6195
0.269	20064	2578	77404	1760	5867	542	0	0	0	0	2606	204	5229	128	0	0	189	45	0	0	18	3	0	0	8	4	6	3	1	1	28	2	24	2	104	38	0	0	9	2	1227	273	1109	315	12620	6274
0.27	18605	2960	69065	1777	6598	556	0	0	92	913	2210	175	5203	126	0	0	225	47	0	0	16	3	0	0	5	4	6	3	1	1	27	2	22	2	103	37	0	0	8	2	1115	249	990	404	4963	3808
0.271	15292	2193	66328	1535	10959	729	0	0	0	0	2448	193	5541	133	0	0	201	45	8	31	18	3	0	0	9	4	6	3	0	1	24	2	23	2	114	41	0	0	10	3	1156	258	1185	313	10004	5077
0.272	7645	3491	33402	1643	9453	620	0	0	0	0	1820	145	4520	108	0	0	110	33	11	24	12	2	0	0	5	3	4	3	1	0	18	1	18	1	89	32	0	0	7	2	924	208	0	0	2624	4415
0.273	16762	2347	73332	1678	10709	735	3008	173	355	920	2665	209	5973	143	0	0	163	45	7	33	17	3	0	0	9	4	8	4	2	1	27	2	24	2	127	46	0	0	6	2	1150	260	1100	324	13451	6608
0.274	18846	2478	74394	1700	9831	701	3831	172	0	0	2401	191	6239	148	0	0	179	46	0	0	19	3	0	0	9	4	7	4	2	1	27	2	25	2	121	44	0	0	8	2	1207	270	1013	320	10815	5479
0.275	21206	26135	88817	12158	11086	772	7668	2480	518	745	2232	180	6594	156	0	0	199	49	8	34	18	3	0	0	10	5	10	4	2	1	36	2	25	2	123	45	0	0	9	3	1310	293	0	0	1922	34511
0.276	14915	2200	65105	1524	18326	1027	10014	203	0	0	2266	186	16898	337	0	0	174	49	9	34	17	4	0	0	15	6	28	6	0	0	89	3	9	2	137	52	0	0	25	4	837	201	1648	379	14633	7121
0.277	12462	2011	58743	1398	15732	925	16039	221	0	0	1258	119	23902	457	0	0	160	48	0	0	21	4	0	0	20	6	45	6	0	0	91	3	1	2	138	54	0	0	34	4	497	137	1644	374	15975	7706
0.278	11345	1908	54608	1315	12118	781	18368	228	0	0	860	95	26995	507	1	2	124	44	0	0	17	4	0	0	22	7	55	7	0	0	73	3	1	2	126	52	0	0	33	4	448	126	1454	355	11943	5912
0.279	12448	2063	62903	1485	12991	828	19755	242	0	0	962	103	28747	540	0	2	172	47	0	0	17	4	0	0	27	7	65	8	0	0	77	3	0	2	146	59	0	0	38	5	562	146	1614	382	18203	8702
0.28	16431	2253	58082	1397	10661	739	23847	264	0	0	872	99	32497	603	0	0	93	40	16	28	12	4	0	0	31	8	112	9	0	0	64	3	0	0	146	60	2	6	37	5	371	115	1780	391	15753	7670
0.281	21931	2657	59978	1441	14427	896	22544	267	0	0	1298	128	34178	635	0	3	120	46	7	32	16	4	0	0	32	8	102	9	0	0	93	4	0	0	159	65	2	6	39	5	504	142	1919	415	20571	9866
0.282	10149	1962	42411	1139	13830	831	17731	248	0	0	1149	112	28149	526	1	2	185	48	0	0	13	4	0	0	25	7	87	8	0	0	81	3	0	0	145	58	1	5	34	4	509	136	1871	417	8961	4723
0.283	16043	2158	49886	1228	9149	1712	22726	248	0	0	906	213	23460	723	5	6	242	132	30	64	7	10	0	0	16	16	66	21	0	0	51	7	0	0	70	75	0	0	24	12	640	290	1719	368	17706	8524
0.284	12747	2039	58088	1392	12259	798	22592	256	0	0	1090	112	30853	576	1	3	156	47	0	0	12	4	0	0	29	8	112	9	0	0	79	3	0	0	143	58	0	0	33	5	471	135	1934	403	17020	8187
0.285	11218	1902	52091	1276	9922	705	26725	275	0	0	894	102	36486	670	0	0	127	43	8	29	11	4	0	0	39	9	184	12	0	0	57	3	1	2	186	73	1	6	41	5	456	129	1739	385	15689	7591
0.286	10689	1837	47673	1188	12861	802	18835	228	0	0	1276	121	27322	512	0	0	164	46	0	0	16	4	0	0	24	7	102	9	0	0	84	3	2	2	145	57	0	0	32	4	578	150	1736	376	14517	7045
0.287	11614	1956	55516	1340	15080	905	21200	250	0	0	1385	131	30763	575	0	0	219	51	0	0	16	4	0	0	26	8	119	10	0	0	97	4	1	2	161	64	0	0	40	5	602	155	1826	399	18583	8872
0.288	12363	2078	65514	1535	11464	770	17970	236	0	0	1540	139	27030	509	0	0	115	41	5	30	15	4	0	0	28	7	81	8	0	0	65	3	2	2	148	58	0	5	35	5	561	148	1310	356	16384	7892
0.289	12851	2158	71688	1657	12878	831	16543	226	0	0	1854	160	24343	465	0	0	137	43	0	0	19	4	0	0	30	8	44	7	0	0	67	3	2	2	162	62	0	0	34	5	592	154	1172	354	18471	8822
0.29	12334	2137	72166	1666	8658	659	14953	220	0	0	1317	122	21820	420	0	0	93	39	4	28	19	4	0	0	19	6	33	6	0	0	52	3	3	2	132	52	0	0	25	4	557	147	1407	357	14993	7273
0.291	12070	2089	69103	1604	7662	615	14154	220	0	0	1364	124	21840	418	0	0	99	40	9	28	22	3	0	0	23	6	33	6	0	0	35	2	7	2	152	58	0	0	29	4	695	172	1260	337	13799	6729
0.292	14238	2232	75595	1724	8187	638	9028	198	0	0	2203	179	14731	297	0	0	162	45	17	31	19	3	0	0	17	6	17	5	0	0	30	2	11	2	140	52	0	0	20	4	789	190	1359	340	11898	5891
0.293	14016	2222	76268	1737	8457	649	7350	188	0	0	2896	227	11532	241	0	0	126	42	18	32	15	3	0	0	17	5	10	4	0	0	29	2	13	2	132	49	0	0	16	3	831	197	1096	325	13314	6516
0.294	15258	2190	64986	1511	10183	704	4985	176	0	0	2995	233	8716	191	0	0	155	44	0	0	18	3	0	0	15	5	8	4	1	1	22	2	21	2	134	49	0	0	11	3	1129	254	1460	335	10758	5405
0.295	15161	2192	65153	1515	10264	711	4846	172	0	0	1883	154	8001	178	0	0	147	44	0	30	18	3	0	0	8	4	5	4	2	1	20	2	25	2	129	47	0	0	10	2	1283	283	1249	325	14543	7069
0.296	16838	2298	67353	1557	9965	701	2978	166	986	956	1920	156	5200	128	0	0	222	48	7	31	22	3	0	0	9	4	4	3	2	1	22	2	28	2	126	45	0	0	9	2	1310	289	1139	319	12264	6080
0.297	16093	2201	61482	1439	10231	699	0	0	364	926	1828	148	3990	104	0	0	169	42	0	0	20	3	0	0	8	4	4	3	2	1	25	2	25	2	116	42	0	0	8	2	1124	252	988	296	11233	5613
0.298	16382	2181	57711	1361	9896	679	0	0	597	900	1133	99	3117	88	0	0	142	41	19	27	18	3	0	0	6	4	5	3	1	0	30	2	24	2	101	36	0	0	7	2	996	227	904	284	8910	4618
0.299	15454	2106	54978	1306	10641	707	0	0	610	889	814	76	3302	91	0	0	171	43	0	0	19	3	0	0	7	4	8	3	1	1	39	2	24	2	98	35	0	0	9	2	986	224	1211	304	10633	5334
0.3	16037	2113	51887	1245	12942	791	0	0	0	0	715	70	3862	102	0	0	153	43	5	25	21	3	0	0	11	4	8	3	2	1	29	2	26	2	111	40	0	0	7	2	995	227	1147	302	8722	4542
0.301	15403	2113	55797	1324	12316	773	0	0	348	914	860	80	3653	99	0	0	166	43	21	26	20	3	0	0	8	4	6	3	1	0	27	2	24	2	105	38	0	0	9	2	947	218	1272	312	12090	5977
0.302	14427	2117	58548	1390	10757	714	0	0	1105	905	803	76	3509	96	0	0	182	43	0	0	18	3	0	0	6	4	6	3	2	1	27	2	25	2	108	39	0	0	9	2	990	225	1328	323	8346	4384
0.303	14754	2107	59386	1395	11869	760	0	0	631	916	990	90	5206	128	0	0	188	46	13	27	20	3	0	0	11	4	13	4	3	1	27	2	24	2	125	45	0	0	10	2	939	216	1350	321	12327	6071
0.304	15548	2160	60602	1419	9300	880	0	0	431	1262	802	93	4551	145	0	0	167	61	0	0	20	4	0	0	8	6	6	5	3	1	24	2	21	2	115	43	0	0	8	3	809	219	1119	302	11218	5594
0.305	15749	2166	59560	1400	9678	676	0	0	0	0	826	78	3919	103	0	0	176	43	4	25	20	3	0	0	9	4	10	3	2	0	26	2	24	2	122	43	0	0	8	2	971	223	1023	293	13562	6621
0.306	18415	2465	75855	1728	10485	730	0	0	318	958	856	81	3896	105	0	0	198	48	0	0	22	3	0	0	8	4	9	4	2	1	31	2	25	2	120	43	0	0	9	2	1055	241	1733	363	13145	6488
0.307	18568	2441	71402	1639	9632	687	0	0	920	968	773	75	3848	104	0	0	201	47	0	0	24	3	0	0	5	4	7	3	2	1	34	2	24	2	113	40	0	0	7	2	1035	235	1590	348	8055	4342
0.308	16020	2184	61513	1434	7332	980	0	0	545	1553	545	85	2686	127	0	0	73	70	46	46	18	5	0	0	1	6	5	5	1	1	32	3	20	3	91	36	0	0	6	3	870	256	1044	286	6905	3782
0.309	17093	2336	70553	1619	9278	674	0	0	0	0	613	63	3337	93	0	0	154	44	0	0	21	3	0	0	9	4	7	3	1	0	37	2	25	2	116	42	0	0	6	2	1074	244	1248	317	13219	6489
0.31	16893	2308	69183	1591	9354	674	0	0	812	950	1051	94	3888	104	0	0	181	45	0	0	21	3	0	0	8	4	8	3	1	1	29	2	23	2	108	39	0	0	9	2	1039	237	990	307	10410	5282
0.311	19197	2494	73480	1681	11128	751	0	0	312	972	2297	183	4029	107	0	0	224	49	10	31	21	3	0	0	7	4	7	3	1	1	25	2	26	2	124	44	0	0	8	2	1150	259	1522	348	9573	4956
0.312	17798	2367	67947	1571	10515	721	0	0	576	967	2200	176	5282	130	0	0	186	46	0	0	23	3	0	0	7	4	8	4	1	1	24	2	26	2	120	43	0	0	8	2	1117	251	1492	337	13625	6688
0.313	22910	2718	70281	1621	7003	586	0	0	1498	980	2196	175	4611	117	0	0	178	46	0	0	21	3	0	0	6	4	5	3	1	1	19	1	24	2	115	41	0	0	10	3	1118	251	1358	328	11442	5805
0.314	25279	2861	68272	1581	3940	827	0	0	896	1531	1520	169	3454	157	0	0	155	75	0	0	15	5	0	0	0	6	2	5	1	1	17	2	16	3	67	30	0	5	4	3	906	277	1229	310	6099	3729
0.315	28004	3136	79208	1804	3735	466	4520	190	751	791	2841	222	6982	161	0	0	265	56	3	36	19	3	0	0	10	5	9	4	2	1	34	2	25	2	126	46	0	0	10	3	1412	307	2388	407	5368	3612
0.316	19796	2449	63530	1481	6087	536	0	0	1267	942	1677	138	4416	112	0	0	201	46	0	0	20	3	0	0	7	4	4	3	1	1	23	2	22	2	99	36	0	0	9	2	1168	259	1123	297	8801	4627
0.317	18300	2351	63859	1486	8203	621	0	0	1188	933	1385	117	3330	92	0	0	195	46	5	30	18	3	0	0	10	4	4	3	2	0	22	1	26	2	107	38	0	0	5	2	1154	257	1156	303	9270	4785
0.318	19295	2468	70623	1621	7040	698	0	0	739	1178	1061	104	3171	104	0	0	261	67	42	40	20	4	0	0	4	4	4	4	1	1	24	2	23	2	96	36	0	0	5	2	972	240	1536	334	7968	4294
0.319	21085	2583	70611	1622	6817	577	0	0	603	975	1018	91	3718	100	0	0	204	48	0	0	21	3	0	0	10	4	10	3	0	1	24	2	24	2	118	42	0	0	9	2	1041	235	1211	314	7347	4086
0.32	20730	2564	71225	1634	6901	580	0	0	1244	965	962	87	3158	90	0	0	163	46	0	0	22	3	0	0	10	4	6	3	1	0	26	2	31	2	109	39	0	0	6	2	993	226	1652	338	7538	4148
0.321	19712	2504	72082	1650	8011	626	0	0	931	986	982	89	3342	93	0	0	207	48	1	28	23	3	0	0	6	4	6	3	2	0	27	2	24	2	123	44	0	0	6	2	1158	258	1487	331	7380	4065
0.322	18689	2417	69430	1595	7861	616	0	0	922	946	1040	93	3059	88	0	0	202	47	0	0	22	3	0	0	5	4	6	3	1	0	27	2	24	2	109	39	0	0	6	2	1031	234	1675	338	5736	3452
0.323	17397	2324	66692	1542	9419	678	0	0	1084	973	1104	98	3256	92	0	0	239	51	0	0	23	3	0	0	9	4	3	3	0	1	28	2	24	2	119	42	0	0	10	3	954	217	1451	331	12165	6046
0.324	16807	2192	55620	1320	9010	646	0	0	1556	938	1565	129	3574	96	0	0	143	43	0	0	22	3	0	0	6	4	5	3	1	1	23	1	21	2	109	39	0	0	8	2	1027	231	1154	299	8099	4284
0.325	17036	2225	57310	1356	9313	663	0	0	1230	941	1400	118	4179	108	0	0	191	47	0	0	21	3	0	0	8	4	7	3	1	0	25	2	23	2	115	41	0	0	6	2	1058	237	1082	297	11369	5686
0.326	18793	2400	64203	1497	8412	635	0	0	786	950	1592	133	5579	134	0	0	219	49	0	0	18	3	0	0	10	4	9	3	1	1	23	2	23	2	114	41	0	0	10	3	1195	265	1366	325	12473	6190
0.327	16888	2287	64192	1498	9329	675	4066	173	699	949	1853	152	8553	188	0	0	216	49	0	0	19	3	0	0	9	4	11	4	1	1	20	2	23	2	111	41	0	0	10	3	1113	250	1306	329	14449	7044
0.328	17582	2318	64170	1493	7884	678	0	0	316	1037	1362	121	4894	131	0	0	183	51	0	0	15	3	0	0	5	4	4	4	1	1	22	2	22	2	103	38	0	0	7	2	1067	248	1530	327	10117	5152
0.329	19232	2444	66272	1538	8693	648	0	0	0	0	1724	142	5646	135	0	0	176	45	0	0	21	3	0	0	8	4	7	3	1	1	20	2	25	2	119	43	0	0	9	2	1233	274	1348	323	12075	6018
0.33	18360	2351	62416	1459	7270	580	0	0	235	926	1537	128	6149	143	0	0	244	48	0	0	20	3	0	0	6	4	8	3	1	1	17	1	24	2	109	40	0	0	8	2	1212	267	988	292	9198	4767
0.331	20513	2566	72393	1661	6340	560	0	0	949	969	1379	118	5097	126	0	0	200	48	0	0	22	3	0	0	7	4	5	3	2	1	21	2	24	2	114	41	0	0	7	2	1299	285	1479	332	10804	5491
0.332	25248	2972	84766	1912	6211	571	0	0	928	841	1445	123	5357	132	0	0	228	52	9	31	21	3	0	0	10	4	9	4	1	1	18	2	27	2	118	42	0	0	12	3	1214	270	1459	354	9785	5155
0.333	20297	2528	67281	1562	4545	489	3511	164	1136	955	1628	136	7306	165	0	0	225	52	0	0	20	3	0	0	13	5	9	4	1	1	21	2	25	2	125	45	0	0	9	3	1463	316	1627	335	13721	6756
0.334	21400	2661	76168	1740	4676	500	4376	176	330	847	1732	144	7780	175	0	0	270	55	0	0	18	3	0	0	11	5	7	4	1	1	23	2	26	2	121	44	0	0	10	3	1514	326	1535	345	12242	6126
0.335	22133	2693	74542	1705	3776	452	0	0	1077	917	1752	144	6177	145	0	0	267	54	0	0	20	3	0	0	9	4	6	3	1	1	32	2	24	2	111	40	0	0	10	2	1538	331	1657	342	10061	5207
0.336	21396	2654	75108	1717	5104	519	3148	173	737	892	1749	145	6184	146	0	0	261	54	0	0	21	3	0	0	12	4	8	4	1	1	37	2	26	2	132	47	0	0	11	3	1422	308	1801	359	12754	6352
0.337	18404	2393	67130	1554	9510	678	0	0	1192	950	1390	119	6031	143	0	0	200	48	7	29	21	3	0	0	9	4	6	3	1	1	21	2	25	2	115	41	0	0	11	3	1193	265	1249	321	9989	5111
0.338	15270	2116	57600	1359	10103	691	0	0	1180	922	1462	122	4018	105	0	0	200	47	0	0	21	3	0	0	7	4	6	3	1	1	27	2	26	2	110	40	0	0	8	2	1084	242	1238	305	10265	5174
0.339	16445	2229	62693	1461	10121	696	0	0	492	941	937	86	3019	87	0	0	233	51	7	29	21	3	0	0	6	4	5	3	1	1	31	2	24	2	102	37	0	0	8	2	1124	251	1864	353	9861	5019
0.34	15652	2145	58226	1371	8749	637	0	0	359	910	1068	94	3643	98	0	0	153	45	0	0	20	3	0	0	6	4	5	3	1	1	25	2	25	2	103	37	0	0	7	2	1083	243	1463	315	11604	5764
0.341	16530	2194	57972	1368	8840	642	0	0	962	923	1205	105	4486	113	0	0	209	49	0	0	21	3	0	0	7	4	6	3	2	1	23	2	24	2	114	41	0	0	8	2	1122	249	1494	317	8800	4578
0.342	15280	2142	54596	1317	8877	641	0	0	709	911	937	85	3506	95	0	0	270	51	0	0	22	3	0	0	8	4	9	3	1	0	27	2	25	2	114	41	0	0	7	2	1123	249	1726	338	9784	5016
0.343	15320	2130	59191	1390	9832	684	0	0	1303	936	843	79	3464	95	0	0	238	52	0	0	25	3	0	0	7	4	5	3	1	1	29	2	25	2	108	39	0	0	7	2	1175	260	2098	365	8708	4529
0.344	14208	2016	53931	1284	9087	644	0	0	943	879	627	64	4697	117	0	0	220	49	0	0	18	3	0	0	6	4	7	3	2	0	29	2	20	2	97	35	0	0	5	2	1003	225	1504	314	10179	5127
0.345	12961	2516	41501	1280	8691	609	0	0	535	830	742	71	5004	120	0	0	240	47	0	0	19	3	0	0	8	4	6	3	1	0	28	2	18	1	93	34	0	0	7	2	973	217	1234	406	3632	3414
0.346	14574	2105	61129	1428	10822	722	0	0	938	938	1022	92	4219	110	0	0	225	50	1	29	23	3	0	0	9	4	8	3	1	1	34	2	26	2	113	40	0	0	8	2	1285	282	1816	350	9816	4987
0.347	15829	2184	60802	1425	12670	798	2829	160	361	968	1676	139	5260	130	0	0	226	51	0	0	20	3	0	0	10	4	12	4	1	1	30	2	25	2	123	44	0	0	9	2	1251	277	1907	363	10789	5420
0.348	17655	2307	61838	1449	10443	721	0	0	738	973	1792	148	6375	150	0	0	178	47	0	0	20	3	0	0	4	4	10	4	1	1	21	2	25	2	108	39	0	0	10	3	1202	268	1458	330	11405	5717
0.349	16796	2261	62596	1464	11751	762	0	0	543	961	2195	175	5925	141	0	0	258	51	6	31	19	3	0	0	11	4	9	4	1	1	24	2	25	2	114	41	0	0	8	2	1304	287	1347	328	13012	6404
0.35	17740	2366	67526	1564	12464	801	3432	173	725	953	2253	180	4558	118	0	0	227	51	0	0	19	3	0	0	9	4	9	4	2	1	34	2	24	2	113	41	0	0	6	2	1149	258	2346	409	13750	6739
0.351	16167	2178	58364	1375	10358	700	0	0	940	915	847	79	3711	100	0	0	199	47	0	0	19	3	0	0	6	4	7	3	2	0	30	2	22	2	101	36	0	0	5	2	1169	259	1748	344	9732	4970
0.352	14870	2106	58876	1384	10355	705	0	0	851	937	743	72	4016	105	0	0	154	45	2	28	21	3	0	0	10	4	10	3	2	0	33	2	23	2	112	40	0	0	7	2	1053	237	1411	321	12186	6014
0.353	17709	2494	67286	1602	9438	677	0	0	688	938	621	64	3104	89	0	0	201	47	0	0	20	3	0	0	6	4	8	3	1	1	41	2	27	2	104	37	0	0	8	2	1063	240	1759	383	12955	6479
0.354	16765	2260	63517	1479	8754	644	0	0	0	0	520	56	2850	83	0	0	140	41	7	25	20	3	0	0	5	4	6	3	1	1	37	2	21	2	99	36	0	0	8	2	1048	237	1228	314	13421	6577
0.355	15255	2141	60683	1420	9642	674	0	0	0	0	740	72	3576	97	0	0	157	44	4	27	19	3	0	0	9	4	5	3	1	0	34	2	20	2	105	38	0	0	6	2	990	224	1424	319	10860	5449
0.356	15766	3021	41588	1433	8575	610	0	0	771	851	1369	115	6327	144	0	0	162	42	0	0	18	3	0	0	8	4	7	3	1	1	21	1	20	2	107	39	0	0	10	2	991	222	910	470	8766	5540
0.357	16555	2203	58359	1377	6272	1386	4574	165	0	0	1141	186	6112	297	1	4	85	98	16	58	13	7	0	0	5	8	8	8	0	1	12	3	18	4	74	42	2	7	8	6	550	286	1247	306	10111	5147
0.358	3675	3986	11554	1745	7067	534	0	0	315	747	1029	89	3601	93	0	0	105	33	0	0	11	2	0	0	5	3	8	3	1	0	13	1	14	1	74	27	0	0	6	2	746	173	0	0	0	0
0.359	14602	2038	53891	1285	10449	697	0	0	826	898	1576	130	4493	113	0	0	199	45	10	28	20	3	0	0	9	4	8	3	2	1	22	1	24	2	114	41	0	0	8	2	1107	247	1124	295	10227	5153
0.36	17356	2269	58926	1393	8626	641	5657	176	634	932	1258	111	9328	201	0	0	228	49	4	29	20	3	0	0	12	5	7	4	2	1	20	2	21	2	123	45	0	0	11	3	1011	229	1497	337	10926	5508
0.361	15147	2080	53741	1285	6829	989	3913	165	1829	1460	831	117	5155	197	0	0	102	70	0	0	12	4	0	0	1	6	5	5	1	1	15	2	12	3	64	30	0	0	5	4	783	248	1272	307	13040	6400
0.362	14785	2058	54086	1290	10725	708	0	0	203	896	1481	124	4869	120	0	0	161	47	33	31	15	3	0	0	7	4	13	4	1	1	24	2	20	2	103	37	0	0	8	2	911	210	1243	308	11347	5647
0.363	14606	2023	51811	1243	10468	698	0	0	941	902	1047	93	3506	95	0	0	138	44	22	29	16	3	0	0	5	4	5	3	2	0	28	2	22	2	93	34	0	0	5	2	953	218	1114	297	11375	5655
0.364	14534	2058	55926	1326	13162	806	0	0	868	921	1105	97	3666	99	0	0	168	44	13	26	20	3	0	0	6	4	5	3	2	1	26	2	26	2	105	38	0	0	7	2	1046	238	1162	308	11753	5820
0.365	14745	2095	58043	1370	13732	827	0	0	56	916	1273	110	5635	135	0	0	171	43	0	0	21	3	0	0	7	4	11	4	2	1	21	2	22	2	125	45	0	0	13	2	948	217	1005	305	12674	6236
0.366	15240	2123	57771	1365	12253	780	3311	162	1378	954	1607	134	5610	135	0	0	224	49	0	0	21	3	0	0	12	4	10	4	2	1	22	2	23	2	136	49	0	0	11	2	1099	248	1202	319	12425	6121
0.367	16531	2207	58939	1388	9538	670	0	0	1588	941	1500	126	5261	128	0	0	186	46	0	0	20	3	0	0	7	4	14	4	2	1	18	1	24	2	118	43	0	0	8	2	1072	239	1298	314	10357	5234
0.368	15219	2096	55986	1327	9019	646	0	0	1192	912	1068	94	3728	99	0	0	144	42	6	26	21	3	0	0	8	4	10	3	1	1	19	1	25	2	114	41	0	0	9	2	1040	235	1214	296	11196	5577
0.369	14858	2132	57311	1368	8588	632	0	0	1313	938	692	68	3314	91	0	0	191	45	18	26	21	3	0	0	7	4	8	3	2	0	21	1	24	2	108	39	0	0	7	2	1067	239	956	295	8625	4521
0.37	17022	2295	65839	1526	8372	633	0	0	807	937	508	55	3464	95	0	0	198	46	4	25	21	3	0	0	9	4	9	3	1	1	22	1	25	2	110	39	0	0	9	2	991	227	1287	315	13613	6668
0.371	15311	2162	63608	1478	8480	630	0	0	950	936	524	57	4148	107	0	0	171	43	5	25	20	3	0	0	7	4	10	3	2	0	23	2	23	2	110	39	0	0	7	2	1015	229	948	293	8526	4460
0.372	14186	2046	57165	1350	8682	632	0	0	0	0	575	60	4857	119	0	0	141	40	6	24	19	3	0	0	11	4	11	3	3	1	23	1	21	2	112	40	0	0	9	2	884	205	1034	284	11206	5563
0.373	13999	2038	57679	1359	8349	618	0	0	423	899	714	70	4702	116	0	0	179	43	9	24	20	3	0	0	9	4	11	3	3	1	22	1	22	2	119	43	0	0	11	2	824	192	847	276	10501	5254
0.374	15651	2145	59523	1395	7746	596	0	0	1035	914	626	63	3415	93	0	0	163	42	5	24	20	3	0	0	10	4	9	3	1	0	24	1	23	2	112	40	0	0	8	2	995	226	897	280	7925	4183
0.375	16920	2301	67769	1563	8876	655	0	0	1122	963	429	50	3512	97	0	0	169	45	5	26	22	3	0	0	9	4	9	3	2	0	31	2	24	2	109	39	0	0	6	2	1037	235	1154	310	11883	5914
0.376	17236	2331	68680	1583	7824	613	0	0	1229	953	428	50	3659	99	0	0	191	45	2	25	20	3	0	0	7	4	7	3	2	0	30	2	27	2	103	37	0	0	5	2	955	218	1157	312	13436	6596
0.377	17512	2331	66354	1537	8696	646	0	0	754	937	705	70	4119	108	0	0	181	46	15	26	19	3	0	0	7	4	7	3	2	1	28	2	23	2	106	38	0	0	8	2	1049	236	1209	313	13312	6543
0.378	17768	2354	66999	1551	10123	703	0	0	742	957	2141	171	4546	116	0	0	211	48	0	0	21	3	0	0	10	4	30	5	2	1	26	2	25	2	116	42	0	0	7	2	1226	272	1636	341	12099	6015
0.379	16738	2288	66837	1547	9440	675	0	0	510	938	1881	153	4985	124	0	0	194	47	0	0	21	3	0	0	9	4	5	3	2	1	28	2	22	2	113	41	0	0	9	2	1048	238	1423	327	12504	6180
0.38	19165	2446	67549	1564	9502	683	3362	167	368	980	2315	184	6086	144	0	0	215	48	0	0	21	3	0	0	6	4	8	4	2	1	20	2	23	2	129	47	0	0	10	2	1255	278	1172	322	10201	5225
0.381	19583	2497	69149	1599	8778	659	4573	181	1949	976	2581	204	7970	178	0	0	195	48	0	0	21	3	0	0	8	4	9	4	2	1	19	2	25	2	122	45	0	0	13	3	1157	259	1252	334	10437	5337
0.382	17854	2293	59153	1394	8055	614	2992	157	767	944	1946	157	5811	137	0	0	207	45	0	0	20	3	0	0	9	4	12	4	1	1	19	1	21	2	122	44	0	0	9	2	1117	249	891	291	8689	4561
0.383	18378	2390	67098	1552	8230	629	0	0	1366	964	1806	147	4211	109	0	0	185	46	8	30	20	3	0	0	8	4	8	3	2	0	21	2	26	2	125	45	0	0	5	2	1174	261	1251	318	10899	5500
0.384	19895	2554	76331	1737	8680	657	0	0	1328	944	1584	132	4070	108	0	0	221	48	2	30	22	3	0	0	10	4	9	4	1	1	26	2	26	2	126	45	0	0	10	2	1329	292	1645	354	9125	4786
0.385	17130	2339	70319	1617	8155	635	3469	168	901	951	1052	95	5571	135	0	0	182	45	0	0	21	3	0	0	10	4	14	4	3	1	28	2	22	2	130	47	0	0	11	2	1087	246	1191	318	12743	6284
0.386	17183	2258	61023	1429	8000	612	0	0	1480	937	1539	128	4390	112	0	0	218	47	10	28	20	3	0	0	9	4	17	4	1	1	22	1	23	2	116	42	0	0	8	2	1110	249	1030	293	10063	5116
0.387	17457	2303	65398	1513	1525	778	0	0	150	1232	133	63	391	89	0	0	27	29	0	0	3	3	0	0	0	0	8	5	0	0	4	2	1	2	23	16	1	3	1	1	239	182	1340	295	9082	4702
0.388	17371	2282	63926	1483	804	532	0	0	0	0	141	62	337	73	0	2	11	17	5	10	4	3	0	0	1	1	3	2	0	0	4	2	2	2	18	13	0	0	4	3	136	84	1210	283	7777	4167
0.389	17005	2278	64755	1502	7640	601	0	0	649	939	727	70	3345	92	0	0	214	47	3	26	20	3	0	0	10	4	7	3	1	1	27	2	23	2	120	43	0	0	9	2	1024	231	1050	301	10118	5140
0.39	17174	2280	64475	1494	3371	1762	0	0	0	0	245	143	1023	228	0	0	0	0	10	24	8	7	0	0	9	7	4	4	0	0	10	4	7	5	23	23	1	2	5	4	278	210	1001	283	8810	4578
0.391	17262	2293	65217	1510	7506	593	0	0	1471	938	606	62	3224	90	0	0	204	45	5	25	20	3	0	0	8	4	6	3	0	1	31	2	24	2	111	40	0	0	10	2	1003	227	1213	308	7712	4139
0.392	17500	2339	68341	1575	7341	591	0	0	0	0	555	59	3430	94	0	0	179	44	15	25	19	3	0	0	7	4	8	3	1	0	37	2	22	2	103	37	0	0	6	2	1100	247	1108	305	11839	5896
0.393	17433	2346	68598	1583	15228	8707	0	0	1365	14474	1382	836	7392	1486	0	0	313	367	56	135	80	59	0	0	24	31	25	28	0	0	86	34	39	33	345	270	12	54	73	59	1528	1158	1388	342	11089	5577
0.394	15887	2245	69225	1591	7200	647	0	0	0	0	707	74	3850	111	0	0	191	51	0	29	16	3	0	0	5	4	6	4	1	1	33	2	19	2	110	40	0	0	6	2	923	220	1284	311	10419	5266
0.395	16971	2294	65763	1525	10334	717	3769	163	1146	993	1748	144	5990	143	0	0	184	45	0	29	20	3	0	0	8	4	18	4	2	1	33	2	22	2	140	50	0	0	7	2	1217	271	1265	325	11255	5650
0.396	16974	2275	63613	1483	10834	729	3604	166	854	959	2227	178	6608	153	0	0	184	46	1	31	19	3	0	0	12	5	25	4	1	1	26	2	22	2	127	46	0	0	10	3	1064	240	1305	325	10056	5135
0.397	17719	2303	61316	1437	10698	720	0	0	1183	943	2986	231	4491	114	0	0	180	46	0	0	18	3	0	0	6	4	11	4	2	1	22	2	23	2	117	42	0	0	9	2	998	228	1231	316	10402	5277
0.398	18773	2406	64765	1510	8944	661	3725	168	571	958	2082	168	6957	160	0	0	206	47	0	0	18	3	0	0	8	4	7	4	1	1	17	1	23	2	119	43	0	0	10	2	1255	278	1225	322	14048	6880
0.399	17060	2249	58715	1389	8177	624	6989	172	534	944	1808	150	11510	239	0	0	201	47	0	0	18	3	0	0	8	4	11	4	0	0	16	2	17	2	133	49	0	0	14	3	995	227	1408	327	10689	5398
0.4	18214	2350	62008	1454	10308	714	4102	164	1827	997	2106	170	7246	165	0	0	270	53	0	0	22	3	0	0	8	4	14	4	2	1	21	2	22	2	127	46	0	0	10	2	1198	267	1514	339	12873	6355
0.401	17740	2325	63697	1485	11493	753	0	0	230	959	1991	161	4265	111	0	0	210	48	0	0	23	3	0	0	9	4	7	3	1	1	28	2	24	2	131	47	0	0	8	2	1185	264	1424	329	12221	6071
0.402	16955	2277	64320	1497	11180	742	0	0	1023	942	1727	142	4145	108	0	0	171	47	2	31	22	3	0	0	8	4	7	3	1	1	25	2	26	2	124	44	0	0	9	2	1202	267	1348	328	11728	5850
0.403	19374	2489	71110	1635	10723	731	0	0	1154	959	1785	147	4179	110	0	0	189	47	0	0	23	3	0	0	8	4	12	4	1	1	26	2	26	2	126	45	0	0	7	2	1180	263	1896	371	11370	5723
0.404	15137	2115	58032	1368	8776	946	0	0	0	0	1025	115	3745	139	0	0	156	69	0	0	18	4	0	0	2	5	7	5	2	1	29	3	22	3	102	39	0	0	9	3	895	247	1201	296	12469	6137
0.405	16629	2253	64612	1499	11308	741	0	0	171	927	1076	96	4648	118	0	0	204	47	0	0	21	3	0	0	9	4	11	4	2	1	37	2	23	2	112	40	0	0	7	2	1041	236	1505	330	6885	3824
0.406	17104	3481	53243	1746	10679	704	0	0	120	890	1013	90	3299	91	0	0	181	44	0	0	21	3	0	0	9	4	8	3	2	0	34	2	22	2	116	42	0	0	6	2	960	218	1432	562	5474	4855
0.407	15030	2108	58764	1381	10615	711	0	0	323	908	877	81	3158	89	0	0	161	43	0	0	21	3	0	0	7	4	8	3	1	0	28	2	24	2	109	39	0	0	6	2	969	223	1320	307	10467	5264
0.408	18038	2333	62681	1464	11948	772	0	0	1979	1002	1142	101	4004	106	0	0	207	49	0	0	23	3	0	0	5	4	6	3	1	1	26	2	26	2	125	45	0	0	9	2	1115	250	1514	336	10684	5410
0.409	17550	2289	61108	1432	10850	724	0	0	1051	947	1351	115	4458	114	0	0	144	44	0	0	22	3	0	0	6	4	6	3	1	1	22	2	25	2	120	43	0	0	8	2	1124	251	1518	331	10687	5402
0.41	18014	2324	60963	1432	10581	720	3651	164	587	955	1773	146	6722	156	0	0	261	52	0	0	23	3	0	0	8	4	23	4	2	1	20	2	25	2	126	45	0	0	12	3	1145	257	1620	342	11188	5632
0.411	17455	2294	62291	1456	12322	784	0	0	1126	952	1507	127	4708	119	0	0	208	47	0	0	21	3	0	0	9	4	19	4	2	1	27	2	27	2	128	46	0	0	7	2	1203	269	1476	331	10437	5300
0.412	15062	2094	56145	1331	10008	1432	0	0	741	2076	932	140	3168	175	0	0	114	89	3	53	20	7	0	0	7	9	4	7	0	1	32	4	25	4	102	43	0	0	12	6	1088	352	1191	299	12803	6280
0.413	15079	2064	54257	1289	1577	714	0	0	0	0	112	52	397	79	0	0	21	23	6	10	4	3	0	0	2	2	2	2	0	0	5	2	2	1	11	10	0	0	3	3	24	33	1031	261	10318	5192
0.414	15180	2083	54870	1303	8993	1222	0	0	0	0	574	97	2432	138	0	0	158	80	50	52	16	5	0	0	4	7	6	6	1	1	26	3	19	3	78	33	0	0	8	5	668	246	1069	285	10515	5282
0.415	16712	2276	64728	1506	13319	827	0	0	1396	966	747	73	4033	108	0	0	161	44	0	0	21	3	0	0	10	4	10	4	1	1	36	2	24	2	116	42	0	0	11	2	1020	233	1624	355	14978	7279
0.416	11448	1780	46001	1122	12925	784	2505	144	488	854	796	76	4754	118	0	0	166	41	3	24	17	3	0	0	11	4	11	3	3	1	31	2	20	2	110	39	0	0	9	2	902	208	908	281	10064	5038
0.417	13629	2008	55766	1323	14100	841	0	0	95	910	758	74	4294	111	0	0	141	41	0	0	19	3	0	0	10	4	9	3	2	1	32	2	22	2	119	43	0	0	9	2	941	217	1332	318	13023	6377
0.418	14154	2034	55435	1317	15281	888	3022	161	76	932	1901	155	5812	139	0	0	209	47	10	30	21	3	0	0	9	4	13	4	1	1	24	2	23	2	133	48	0	0	10	3	1084	246	1330	327	9820	4974
0.419	15862	2131	54275	1297	10374	701	4165	168	906	925	3985	302	7222	163	0	0	219	49	0	0	20	3	0	0	8	4	11	4	1	1	20	2	23	2	139	50	0	0	16	3	1056	237	1348	322	9820	5006
0.42	14436	2047	54091	1293	12170	770	3371	165	626	924	3083	238	6048	142	0	0	231	48	7	33	19	3	0	0	10	4	12	4	1	1	21	2	23	2	151	54	0	0	12	3	1156	258	1261	320	13738	6705
0.421	12704	1922	52335	1253	14008	831	0	0	438	883	1212	105	3827	102	0	0	101	41	10	27	19	3	0	0	11	4	8	3	1	1	27	2	24	2	118	42	0	0	10	2	864	200	1161	306	13060	6377
0.422	12384	1892	50755	1222	12810	790	3381	161	437	899	1164	102	5447	131	0	0	150	42	0	0	18	3	0	0	11	4	15	4	2	1	29	2	21	2	133	48	0	0	14	2	1010	230	1139	306	13554	6587
0.423	13586	1963	51698	1240	13949	830	0	0	392	905	1525	127	3947	104	0	0	131	41	13	27	21	3	0	0	5	4	19	4	2	1	23	2	25	2	122	44	0	0	10	2	887	206	1309	312	10937	5433
0.424	13630	1969	52163	1249	9652	941	0	0	358	1274	1000	108	2251	99	0	0	129	57	1	35	16	4	0	0	8	5	4	4	1	1	14	2	21	2	97	37	0	0	5	3	840	231	1178	297	13238	6457
0.425	13518	1969	52774	1262	11256	913	0	0	240	1190	656	77	3066	107	0	0	164	57	0	0	20	4	0	0	6	5	7	4	1	1	22	2	25	2	106	39	0	0	9	3	764	205	1187	300	13179	6430
0.426	12612	1897	51116	1226	13175	797	0	0	786	876	380	47	4832	120	0	0	148	40	9	23	20	3	0	0	13	4	11	3	2	1	26	2	21	2	115	41	0	0	13	2	902	208	1223	304	8797	4502
0.427	16299	2351	44268	1196	11813	740	0	0	655	875	366	46	4559	114	0	0	135	39	0	0	20	3	0	0	10	4	8	3	2	1	23	1	22	2	106	38	0	0	10	2	881	203	1078	341	8683	4781
0.428	12277	1846	48378	1171	11139	715	0	0	472	860	626	63	3910	102	0	0	172	42	2	24	21	3	0	0	6	4	7	3	1	0	20	1	23	2	103	37	0	0	7	2	952	217	898	275	10452	5215
0.429	11172	1776	42996	1079	10094	970	0	0	887	1300	1337	135	3715	134	0	0	116	57	0	0	16	4	0	0	6	5	3	4	1	1	17	2	20	2	101	39	0	0	7	3	831	233	969	279	9382	4760
0.43	10685	2658	37373	1319	9504	630	0	0	0	0	2814	216	3681	94	0	0	166	39	7	28	17	2	0	0	8	4	7	3	2	0	15	1	19	2	107	38	0	0	6	2	915	207	1222	465	4231	3791
0.431	14133	2005	51908	1250	10711	703	0	0	295	885	3700	280	3508	94	0	0	136	41	19	33	21	3	0	0	6	4	8	3	1	0	16	1	22	2	123	44	0	0	7	2	995	225	1256	310	13011	6371
0.432	13868	1961	49663	1201	9968	673	0	0	0	0	3366	256	3978	102	0	0	134	41	14	32	18	3	0	0	6	4	30	4	1	1	15	1	23	2	119	43	0	0	7	2	999	226	1076	292	12528	6143
0.433	12528	1842	45598	1119	10438	685	0	0	0	0	3195	244	5488	129	0	0	125	40	0	0	19	3	0	0	5	4	7	3	0	0	17	1	22	2	123	44	0	0	12	3	982	222	1082	283	11334	5599
0.434	13226	1897	47440	1154	9563	715	0	0	205	953	1294	113	2845	88	0	0	143	44	22	28	18	3	0	0	5	4	6	3	1	0	15	1	21	2	93	34	0	0	5	2	854	205	985	276	12168	5973
0.435	12365	1854	48677	1178	10203	681	0	0	550	874	693	67	3179	88	0	0	189	42	18	24	19	3	0	0	7	4	6	3	2	0	17	1	25	2	100	36	0	0	6	2	1020	230	797	272	10697	5321
0.436	12223	1835	47958	1162	8615	620	3445	146	450	851	521	55	3123	87	0	0	154	40	0	0	18	3	0	0	10	4	6	3	1	0	14	1	22	2	97	35	0	0	7	2	937	214	983	275	8763	4482
0.437	13731	2036	58375	1377	9091	659	6995	177	975	941	452	51	3291	92	0	0	134	40	11	25	22	3	0	0	12	4	8	3	1	1	14	1	24	2	112	40	0	0	8	2	958	220	1137	309	11083	5535
0.438	13477	2024	58765	1385	10288	714	11313	184	641	953	351	46	4218	111	0	0	130	41	16	24	24	3	0	0	12	4	10	4	2	1	15	1	29	2	122	44	0	0	8	2	1034	236	1079	310	10720	5382
0.439	12686	1958	55513	1323	10530	821	16086	207	214	1037	329	50	4234	123	0	0	123	48	7	29	22	3	0	0	12	5	9	4	2	1	14	2	27	2	123	45	0	0	8	3	934	229	1318	324	13892	6757
0.44	12011	1852	49716	1204	9731	682	12102	184	0	0	312	42	2984	86	0	0	149	43	0	0	20	3	0	0	10	4	10	3	2	0	23	1	21	2	114	41	0	0	7	2	811	192	1001	295	11550	5709
0.441	3973	985	15324	489	13236	750	0	0	0	0	218	30	1269	47	0	0	147	36	0	20	11	2	0	0	8	3	6	2	1	0	42	2	14	1	88	31	0	0	4	2	456	118	1544	291	13101	6255
0.442	715	658	7830	321	3787	358	0	0	0	0	91	17	465	24	0	1	44	22	18	15	5	2	0	0	4	2	3	2	1	0	18	1	6	1	58	21	0	0	2	1	180	61	904	219	10960	5232
0.443	502	654	7823	320	1444	244	0	0	0	0	35	11	196	15	0	1	3	16	10	12	3	1	0	0	3	2	3	2	0	0	10	1	2	1	54	19	0	0	2	1	45	37	785	205	11420	5440
0.444	508	656	7888	321	971	223	0	0	0	0	21	10	135	13	0	0	10	17	9	12	2	1	0	0	4	2	3	2	0	0	6	1	1	1	57	20	0	0	2	1	29	35	871	209	11534	5489
0.445	302	766	8205	371	792	212	0	0	0	0	9	8	105	11	0	1	3	15	11	12	1	1	0	0	2	2	3	2	0	0	4	1	0	1	54	19	0	0	2	1	11	35	931	242	10811	5212
0.446	774	674	8200	330	868	216	0	0	0	0	1	7	85	10	0	1	2	15	11	12	1	1	0	0	4	2	3	2	0	0	2	0	1	1	53	19	0	0	1	1	0	0	819	207	11933	5675
0.447	401	603	6799	293	805	206	0	0	0	0	4	7	79	10	0	1	10	15	8	11	0	1	0	0	3	2	3	2	0	0	1	0	0	1	48	17	0	0	2	1	1	32	674	189	8255	3996
0.448	689	637	7418	309	1158	224	0	0	0	0	7	7	83	10	0	0	6	14	11	11	1	1	0	0	3	2	3	2	0	0	1	0	0	1	51	18	0	0	2	1	18	32	690	196	9910	4746
0.449	506	652	7885	320	966	215	0	0	0	0	2	7	81	10	0	1	1	14	14	12	1	1	0	0	3	2	4	2	0	0	1	0	0	1	52	18	0	0	2	1	22	32	821	207	10286	4926
0.45	375	639	7539	313	731	205	0	0	0	0	4	7	73	10	0	0	3	14	18	12	0	1	0	0	2	2	3	2	0	0	1	0	0	1	50	18	0	0	2	1	8	32	898	209	10895	5200
0.451	552	604	6783	293	775	209	0	0	0	0	2	7	75	10	0	1	9	15	16	12	1	1	0	0	3	2	2	2	0	0	1	0	0	1	50	18	0	0	2	1	9	33	651	189	8612	4159
0.452	287	601	6658	290	839	209	0	0	0	0	7	7	75	10	0	0	0	0	16	12	0	1	0	0	2	2	2	2	0	0	1	0	0	1	50	18	0	0	1	1	6	33	634	188	9499	4553
0.453	19	786	6459	371	827	205	0	0	0	0	1	6	69	9	0	1	0	0	12	11	0	1	0	0	3	2	4	2	0	0	0	0	0	1	49	17	0	0	1	1	0	0	626	246	5669	2994
0.454	416	670	8217	331	990	225	0	0	0	0	5	7	87	11	0	1	7	15	14	12	0	1	0	0	3	2	3	2	0	0	1	0	0	1	51	18	0	0	2	1	1	34	822	212	11600	5525
0.455	594	661	7946	323	951	218	0	0	0	0	6	7	83	10	0	1	0	0	12	12	0	1	0	0	3	2	4	2	0	0	0	0	0	1	52	18	0	0	2	1	2	34	814	208	11355	5413
0.456	536	618	7143	302	853	208	0	0	0	0	5	7	74	10	0	1	2	13	17	12	1	1	0	0	3	2	3	2	0	0	1	0	1	1	46	16	0	0	2	1	12	31	528	185	8425	4079
0.457	565	654	8003	324	875	213	0	0	0	0	4	7	80	10	1	1	14	15	6	11	0	1	0	0	2	2	3	2	0	0	0	0	1	1	50	18	0	0	2	1	14	33	762	204	9468	4556
0.458	484	662	8124	327	857	212	0	0	0	0	4	7	84	10	0	1	4	14	7	11	0	1	0	0	3	2	3	2	0	0	1	0	0	1	49	18	0	0	2	1	6	33	778	205	10332	4951
0.459	755	641	7549	313	889	210	0	0	0	0	6	7	89	10	0	1	5	14	17	13	1	1	0	0	2	2	2	2	0	0	0	0	0	1	44	16	0	0	2	1	0	0	693	194	9214	4437
0.46	562	642	7730	316	671	200	0	0	0	0	3	7	87	10	0	1	7	15	12	12	0	1	0	0	2	2	3	2	0	0	0	0	0	1	50	18	0	0	2	1	6	34	695	194	9871	4727
0.461	526	667	8454	335	1038	221	0	0	0	0	11	8	97	11	0	1	5	14	13	12	0	1	0	0	3	2	4	2	0	0	1	0	0	1	50	18	0	0	2	1	16	32	879	212	9124	4406
0.462	647	691	8812	344	980	222	0	0	0	0	10	8	92	11	0	1	6	14	15	12	1	1	0	0	3	2	4	2	0	0	0	0	0	1	51	18	0	0	2	1	23	33	938	220	11855	5650
0.463	632	664	8164	329	1008	222	0	0	0	0	7	8	86	10	0	1	6	15	15	13	0	1	0	0	2	2	3	2	0	0	0	0	0	1	53	19	0	0	2	1	33	35	856	210	8949	4335
0.464	556	715	9399	359	869	216	0	0	0	0	0	0	85	11	0	1	7	15	15	12	1	1	0	0	3	2	4	2	0	0	1	0	0	1	53	19	0	0	1	1	4	34	880	216	12625	6007
0.465	839	702	9013	350	972	219	0	0	0	0	8	8	89	11	0	1	9	15	19	13	1	1	0	0	4	2	4	2	0	0	1	0	1	1	57	20	0	0	3	1	29	34	905	214	10826	5188
0.466	0	0	807	304	752	195	0	0	0	0	4	7	79	9	0	1	1	13	9	11	0	1	0	0	2	2	3	1	0	0	1	0	0	1	45	16	0	0	2	1	13	29	0	0	0	0
0.467	1195	711	8983	350	779	210	0	0	0	0	5	8	94	11	0	1	0	0	6	12	0	1	0	0	3	2	3	2	0	0	1	0	0	1	50	18	0	0	2	1	4	33	878	213	12203	5807
0.468	608	692	8928	347	820	217	0	0	0	0	5	8	92	11	1	1	7	15	18	13	0	1	0	0	4	2	3	2	0	0	0	0	1	1	60	21	0	0	3	1	7	36	964	217	10878	5205
0.469	917	704	9006	350	821	216	0	0	0	0	2	7	91	11	0	1	11	16	10	12	0	1	0	0	2	2	3	2	0	0	0	0	0	1	51	18	0	0	2	1	20	32	936	216	11281	5386
0.47	898	707	8995	350	906	220	0	0	0	0	4	8	89	11	1	1	4	15	14	13	1	1	0	0	2	2	3	2	0	0	1	0	1	1	53	19	0	0	2	1	3	35	843	210	12778	6066
0.471	846	713	9141	353	811	242	0	0	0	0	11	9	76	11	0	1	6	16	17	14	0	1	0	0	1	2	3	2	0	0	1	1	0	1	48	17	0	0	2	1	35	38	1017	223	13203	6263
0.472	410	640	7690	316	840	210	0	0	0	0	5	7	74	10	0	1	4	14	8	11	1	1	0	0	3	2	3	2	0	0	1	0	0	1	51	18	0	0	1	1	11	33	715	194	9941	4761
0.473	276	625	7356	308	834	346	0	0	0	0	9	12	85	16	1	1	1	22	16	20	0	1	0	0	0	0	1	2	0	0	0	1	1	1	53	20	0	3	2	2	9	53	749	195	8527	4134
0.474	1459	752	8955	353	1735	268	0	0	0	0	4	8	82	11	1	1	0	0	15	14	1	1	0	0	3	2	29	3	0	0	1	1	0	1	59	21	0	0	2	1	33	36	2013	282	16785	7918
0.475	5630	1110	9687	381	4056	388	0	0	0	0	13	10	102	13	0	1	10	19	6	14	1	1	0	0	6	3	97	6	0	0	2	1	0	1	70	25	0	0	3	1	61	45	4979	547	27133	12716
0.476	6089	1168	9906	391	3587	396	0	0	0	0	6	10	97	14	1	1	15	22	5	15	2	1	0	0	3	3	91	6	0	0	1	1	0	1	66	24	0	0	3	2	29	44	5148	565	34683	16194
0.477	4415	1019	9453	373	3804	599	0	0	0	0	7	15	114	22	0	2	2	29	21	26	1	2	0	0	7	5	125	10	0	0	2	1	0	2	77	29	0	0	2	2	19	66	4995	548	27140	12727
0.478	4574	1011	9277	368	3660	365	0	0	0	0	5	9	79	12	1	1	19	19	17	15	2	1	0	0	4	3	139	6	1	0	3	1	0	1	67	24	0	0	2	1	44	40	4788	527	24298	11415
0.479	5750	1093	8911	365	4012	387	0	0	0	0	4	9	94	13	0	1	21	21	17	16	2	1	0	0	6	3	155	7	0	0	3	1	0	1	72	26	0	0	3	2	28	42	4876	537	31291	14628
0.48	3951	1155	9124	425	4154	387	0	0	0	0	8	10	96	13	0	1	23	21	11	15	2	1	0	0	7	3	165	7	0	0	2	1	0	1	70	25	0	0	3	1	33	42	4593	535	25318	11954
0.481	4179	1009	9086	364	4125	389	0	0	0	0	6	10	100	13	0	1	31	22	16	16	2	1	0	0	6	3	172	7	0	0	3	1	0	0	71	25	0	0	3	1	25	42	4588	509	30822	14400
0.482	3764	970	8820	356	3923	381	0	0	0	0	9	10	90	12	0	1	24	21	9	15	2	1	0	0	3	3	162	7	1	0	3	1	0	0	66	24	1	2	1	1	37	43	4666	516	27335	12799
0.483	4990	1069	8917	362	3905	379	0	0	0	0	20	11	80	12	0	1	15	19	15	15	2	1	0	0	3	3	152	7	0	0	3	1	0	1	64	23	0	0	2	1	44	42	5041	553	29157	13651
0.484	4116	1004	8889	358	4020	386	0	0	0	0	13	10	80	12	1	1	6	20	9	15	2	1	0	0	6	3	160	7	1	0	3	1	0	0	69	25	0	0	2	1	17	46	4918	540	26645	12492
0.485	3869	967	8218	340	4040	383	0	0	0	0	14	11	78	12	0	1	9	20	19	16	2	1	0	0	4	3	151	7	0	0	3	1	0	1	72	26	0	0	2	2	37	43	4680	517	26110	12237
0.486	6918	1256	9734	390	965	682	0	0	283	1097	0	0	32	19	0	0	0	0	0	0	5	3	0	0	0	0	42	15	0	0	3	2	1	2	22	16	2	4	2	2	51	60	5284	577	39375	18351
0.487	3465	941	8616	348	4143	382	0	0	0	0	7	9	93	12	0	0	11	20	6	14	2	1	0	0	5	3	155	7	0	0	2	1	0	1	68	24	0	0	1	1	40	41	4446	492	19713	9305
0.488	5740	1126	8949	365	4457	407	0	0	0	0	4	10	94	13	0	1	17	21	21	17	3	2	0	0	5	3	171	7	0	0	3	1	0	0	73	26	0	0	3	2	54	45	4937	543	29981	14025
0.489	4967	1066	9306	372	4137	394	0	0	0	0	10	10	92	13	0	1	21	20	11	15	3	1	0	0	10	3	168	7	1	0	3	1	0	1	75	26	0	0	2	1	90	49	4972	547	30970	14477
0.49	5535	1083	8875	364	4017	855	0	0	0	0	11	21	86	28	1	3	6	42	0	0	1	3	0	0	4	6	160	16	0	0	3	2	0	2	80	32	0	5	6	4	0	0	5113	560	30580	14305
0.491	5012	1059	8984	366	4036	388	0	0	0	0	12	11	89	12	0	1	5	19	19	17	3	1	0	0	5	3	169	7	1	0	3	1	0	0	76	27	0	0	1	2	29	43	5172	566	29159	13653
0.492	5375	1098	9222	370	3783	444	0	0	0	0	4	11	95	15	1	1	16	23	21	19	2	2	0	0	5	3	132	8	0	0	3	1	0	1	68	25	0	0	4	2	21	49	4940	544	31422	14693
0.493	5066	1047	9237	367	2921	591	0	0	0	0	6	17	55	18	0	2	22	32	16	26	1	2	0	0	5	5	120	11	1	1	2	1	0	2	58	23	0	0	1	2	0	0	4918	540	24185	11362
0.494	3096	912	9073	358	3066	338	0	0	0	0	5	9	102	13	1	1	10	18	16	15	2	1	0	0	5	3	105	6	0	0	2	1	0	1	65	23	0	0	2	1	31	40	4767	524	21416	10082
0.495	681	658	7269	307	710	214	0	0	0	0	9	8	75	10	0	1	7	16	15	13	1	1	0	0	3	2	33	3	0	0	0	0	0	1	51	18	0	0	2	1	9	36	1071	214	12370	5878
0.496	623	632	7106	303	590	199	0	0	0	0	11	8	66	9	0	0	9	15	9	11	0	1	0	0	3	2	73	4	0	0	1	0	0	1	46	17	0	0	0	1	14	33	909	206	10795	5153
All concentrations are given in ppm.

## Sheet: Table S2
Table S2, Re-Os isotope composition of the studied black shale of Lantian biota
Batch/Sample	Re (ppb)	2σ	Os1 (ppt)	2σ	OsC2 (ppt)	2σ	192Os (ppt)	2σ	187Re/188Os	2σ	187Os/188Os	2σ	rho	% Re Blank	% 187Os Blank	% 188Os Blank
RO1157-3-3	11.3952	0.00545025	428.542	1.48711	356.347	1.28139	129.945	0.202779	174.456	0.283157	2.89881	0.00647381	0.665429	0.298055	0.00426409	0.0621345
RO1157-5-12	11.8825	0.00557917	490.263	1.56493	413.976	1.36122	151.318	0.217899	156.221	0.235303	2.71554	0.00536942	0.689905	0.287522	0.00393205	0.0536738
RO1168-2_8	10.1882	0.00541735	429.721	1.57415	365.174	1.38676	133.167	0.232462	152.203	0.276555	2.67433	0.00696739	0.639059	0.392448	0.00168173	0.0180863
RO1168-3_9	12.0106	0.00699579	460.049	1.75401	383.956	1.52587	140.02	0.261523	170.645	0.332683	2.85995	0.0077177	0.659174	0.332914	0.00149567	0.0172017
RO1168-4_11	4.35488	0.00697031	155.638	0.95273	127.68	0.85785	46.6912	0.18671	185.551	0.796188	3.01117	0.0191676	0.580533	0.917831	0.00425852	0.0515669
RO1168-5_05	9.08707	0.00677503	281.473	1.50178	223.133	1.29457	81.6576	0.246706	221.386	0.686981	3.37083	0.0156161	0.631598	0.439799	0.00217487	0.0294814
RO1168-6_12	11.3565	0.0062344	462.52	2.39875	389.609	2.15792	142.429	0.456864	158.624	0.515561	2.73896	0.0135728	0.637572	0.352079	0.00153529	0.0169104
RO1170-7_10	4.28915	0.00427241	157.989	0.760314	130.589	0.6697	47.7068	0.135244	178.86	0.533379	2.94253	0.0121426	0.642541	0.929148	0.00912961	0.135039
RO1170-9_11	10.6957	0.00552798	383.684	1.82747	315.921	1.59934	115.201	0.286477	184.704	0.467883	3.00228	0.0120224	0.606887	0.317966	0.00372015	0.0561435
RO1170-10_12	10.9414	0.006657	452.698	3.84505	383.379	3.70986	139.796	1.07292	155.706	1.19849	2.71025	0.0326577	0.634859	0.5481	0.00339342	0.046231
RO1176-3_14	11.0379	0.00535733	474.272	1.66674	404.575	1.46977	147.449	0.242953	148.925	0.254703	2.64135	0.00640246	0.650277	0.305816	0.00409889	0.0544226
RO1176-4_14	10.8674	0.00566906	462.048	1.72343	393.428	1.52339	143.394	0.270123	150.771	0.29369	2.65943	0.00719318	0.669733	0.31145	0.0041974	0.0561121
RO1176-5_15	7.11435	0.00476173	324.377	1.13446	279.455	1.00988	101.848	0.181112	138.964	0.26258	2.54128	0.00624442	0.673867	0.476079	0.00618865	0.079056
1, total concentration of Os including both radiogenic and common Os after blank correction
2, concentration of common Os after blank correction

## Sheet: Table S3
Reference	Area	Lithostratigraphic unit	Age (Ma)	2s	Osi	2σ
Rooney et al., 2020	Oman	Buah	562.7	3.8	0.68	0.01
Rooney et al., 2020	NW Canada	PH4	567.3	3	0.61	0.01
Rooney et al., 2020	NW Canada	Nadaleen	574	4.7	0.6	0.01
Rooney et al., 2020	NW Canada	Nadaleen	575	5.1	0.6	0.01
Rooney et al., 2020	Oman	Khufai	578.2	5.9	1.15	0.05
Yang et al., 2021	South China	Doushantuo	585.7	2.8	1.81	0.02
Yang et al., 2021	South China	Doushantuo	587.2	3.6	0.91	0.02
This study	South China	Lantian	602	7	1.14	0.02
Kendall et al., 2004	Western Canada	Old Fort Point	607.8	4.7	0.62	0.03
Rooney et al., 2015	NW Canada	Sheepbed	632.3	5.9	1.21	0.04

## Sheet: G49734
Yang, C., et al., 2022, Implications for Ediacaran biological evolution from the ca. 602 Ma Lantian biota in China: Geology, https://doi.org/10.1130/G49734.1
